# Supplementary material for: Small-scale variation in a pristine montane cloud forest: evidence on high soil fungal diversity and biogeochemical heterogeneity
Source: PeerJ. 2021 Aug 11;9:e11956. doi: 10.7717/peerj.11956 (PMC8364316; doi:10.7717/peerj.11956)
Supplement: Supplemental Information 2 [file peerj-09-11956-s002.xlsx]

## Sheet: Hoja1
ASV ID	Taxonomy	Taxon	Taxon Level	Trophic Mode	Guild	Growth Morphology	Trait	Confidence Ranking	Notes	Citation/Source
ISV_1001	k__Fungi;p__Ascomycota;c__Leotiomycetes;o__Helotiales;f__Hyaloscyphaceae;g__Hyaloscypha;s__Hyaloscypha_albohyalina_var._spiralis	Hyaloscypha	13	Saprotroph	Undefined Saprotroph	NULL	NULL	Probable	NULL	b'Tedersoo L, et al. 2014. Science 346:1256688'
ISV_1002	k__Fungi;p__Ascomycota;c__Leotiomycetes;o__Helotiales;f__Helotiaceae;g__unidentified_65;s__Helotiaceae_sp	Helotiaceae	9	Saprotroph-Symbiotroph	Ectomycorrhizal-Fungal Parasite-Plant Pathogen-Wood Saprotroph	Microfungus	NULL	Probable	Usually saprobic on herbaceous or woody tissues, some species fungicolous. A few species are known to form mycorrhizae (Cannon & Kirk 2007)	b'Cannon PF, Kirk PM. 2007. Fungal Families of the World. CAB International, Cambridge'
ISV_1007	k__Fungi;p__Ascomycota;c__Leotiomycetes;o__Helotiales;f__Vibrisseaceae;g__Phialocephala;s__unclassified_Phialocephala	Phialocephala	13	Symbiotroph	Endophyte	NULL	NULL	Highly Probable	Dark Septate Endophyte, known from plant roots.	b'Newsham 2011. New Phytologist 190:783-793 (as DSE)'
ISV_1017	k__Fungi;p__Basidiomycota;c__Agaricomycetes;o__Polyporales;f__Polyporaceae;g__Coriolopsis;s__Coriolopsis_sp	Polyporaceae	9	Saprotroph	Wood Saprotroph	Polyporoid	Brown Rot-White Rot	Probable	Lignicolous, causing brown or white rot, mostly of broadleaved trees (Cannon & Kirk 2007)	b'Cannon PF, Kirk PM. 2007. Fungal Families of the World. CAB International, Cambridge'
ISV_1020	k__Fungi;p__Ascomycota;c__Dothideomycetes;o__Capnodiales;f__Mycosphaerellaceae;g__unidentified_1604;s__Mycosphaerellaceae_sp	Mycosphaerellaceae	9	Pathotroph-Saprotroph	Plant Pathogen-Undefined Saprotroph	Microfungus	NULL	Probable	Biotrophic, necrotrophic or saprobic on various plant tissues (Cannon & Kirk 2007)	b'Cannon PF, Kirk PM. 2007. Fungal Families of the World. CAB International, Cambridge'
ISV_1033	k__Fungi;p__Basidiomycota;c__Agaricomycetes;o__Agaricales;f__Cyphellaceae;g__Rectipilus;s__unclassified_Rectipilus	Rectipilus	13	Saprotroph	Undefined Saprotroph	NULL	NULL	Probable	NULL	b'Tedersoo L, et al. 2014. Science 346:1256688'
ISV_1045	k__Fungi;p__Ascomycota;c__Eurotiomycetes;o__Eurotiales;f__Aspergillaceae;g__Penicillium;s__unclassified_Penicillium	Eurotiales	7	Saprotroph	Undefined Saprotroph	Microfungus	NULL	Possible	NULL	b'Sterkenburg E, et al. 2015. New Phytologist 207:1145-1158'
ISV_1051	k__Fungi;p__Ascomycota;c__Eurotiomycetes;o__Chaetothyriales;f__Cyphellophoraceae;g__Cyphellophora;s__Cyphellophora_sp	Cyphellophora	13	Pathotroph-Saprotroph	Animal Pathogen-Undefined Saprotroph	Facultative Yeast-Microfungus	NULL	Probable	Consult the current literature for updated names on this group that included the Black Yeasts; Some species are likely opportunistic human pathogen (Irinyi et al. 2015)	b'Tedersoo L, et al. 2014. Science 346:1256688 (doi:10.1126/science.1256688); Irinyi L, et al. 2015. Medical Mycology 53:313-337'
ISV_106	k__Fungi;p__Ascomycota;c__Sordariomycetes;o__Chaetosphaeriales;f__Chaetosphaeriaceae;g__Chaetosphaeria;s__Chaetosphaeria_sp	Chaetosphaeria	13	Saprotroph-Symbiotroph	Endophyte-Litter Saprotroph-Wood Saprotroph	NULL	NULL	Probable	NULL	b'R\xc3\xa9blov\xc3\xa1 M et al. 2006. Mycological Research 110:104-109; Tedersoo L, et al. 2014. Science 346:1256688'
ISV_1060	k__Fungi;p__Ascomycota;c__Leotiomycetes;o__Helotiales;f__Helotiales_fam_Incertae_sedis;g__Spirosphaera;s__Spirosphaera_beverwijkiana	Spirosphaera	13	Saprotroph	Undefined Saprotroph	NULL	NULL	Probable	NULL	b'Tedersoo L, et al. 2014. Science 346:1256688'
ISV_1074	k__Fungi;p__Basidiomycota;c__Agaricomycetes;o__Agaricales;f__Cortinariaceae;g__Cortinarius;s__unclassified_Cortinarius	Cortinarius	13	Symbiotroph	Ectomycorrhizal	Agaricoid	NULL	Highly Probable	NULL	b'Rinaldi AC, et al. 2008. Fungal Diversity 33:1-45; Tedersoo L, et al. 2010. Mycorrhiza 20:217-263; http://mycorrhizas.info/ecmf.html'
ISV_1075	k__Fungi;p__Ascomycota;c__Sordariomycetes;o__Hypocreales;f__Stachybotryaceae;g__Alfaria;s__unclassified_Alfaria	Hypocreales	7	Saprotroph	Undefined Saprotroph	Microfungus	NULL	Possible	NULL	b'Sterkenburg E, et al. 2015. New Phytologist 207:1145-1158'
ISV_1076	k__Fungi;p__Ascomycota;c__Sordariomycetes;o__Chaetosphaeriales;f__Chaetosphaeriaceae;g__Chaetosphaeria;s__Chaetosphaeria_sp	Chaetosphaeria	13	Saprotroph-Symbiotroph	Endophyte-Litter Saprotroph-Wood Saprotroph	NULL	NULL	Probable	NULL	b'R\xc3\xa9blov\xc3\xa1 M et al. 2006. Mycological Research 110:104-109; Tedersoo L, et al. 2014. Science 346:1256688'
ISV_108	k__Fungi;p__Ascomycota;c__Leotiomycetes;o__Helotiales;f__Helotiales_fam_Incertae_sedis;g__Leohumicola;s__Leohumicola_sp	Leohumicola	13	Saprotroph	Undefined Saprotroph	NULL	NULL	Probable	NULL	b'Tedersoo L, et al. 2014. Science 346:1256688'
ISV_1083	k__Fungi;p__Ascomycota;c__Sordariomycetes;o__Sordariales;f__Lasiosphaeriaceae;g__Podospora;s__Podospora_sp	Podospora	13	Saprotroph-Symbiotroph	Dung Saprotroph-Endophyte-Litter Saprotroph-Undefined Saprotroph	Microfungus	NULL	Possible	Endophyte detection method-culture (David et al. 2016)	b'Bell A. 1983. Dung Fungi: An Illustrated Guide to Coprophilous Fungi in New Zealand. Victoria University Press, Wellington; Tedersoo L, et al. 2014. Science 346:1256688; David AS, et al. 2016. Microbial Ecology 71:912-926; Purahong W, et al. 2016. Molecular Ecology 25:4059-4074 (as litter saprotroph)'
ISV_1084	k__Fungi;p__Ascomycota;c__Sordariomycetes;o__Hypocreales;f__Hypocreales_fam_Incertae_sedis;g__Cylindrium;s__Cylindrium_purgamentum	Hypocreales	7	Saprotroph	Undefined Saprotroph	Microfungus	NULL	Possible	NULL	b'Sterkenburg E, et al. 2015. New Phytologist 207:1145-1158'
ISV_1089	k__Fungi;p__Glomeromycota;c__Glomeromycetes;o__Diversisporales;f__Acaulosporaceae;g__Acaulospora;s__unclassified_Acaulospora	Acaulospora	13	Symbiotroph	Arbuscular Mycorrhizal	NULL	NULL	Highly Probable	NULL	b'Redecker D, et al. 2013. Mycorrhiza 23:515-531'
ISV_1091	k__Fungi;p__Ascomycota;c__Sordariomycetes;o__Hypocreales;f__Nectriaceae;g__Calonectria;s__unclassified_Calonectria	Calonectria	13	Pathotroph	Plant Pathogen	NULL	NULL	Probable	NULL	b'Tedersoo L, et al. 2014. Science 346:1256688'
ISV_110	k__Fungi;p__Ascomycota;c__Sordariomycetes;o__Chaetosphaeriales;f__Chaetosphaeriaceae;g__Chloridium;s__Chloridium_sp	Chloridium	13	Pathotroph-Saprotroph-Symbiotroph	Ectomycorrhizal-Endophyte-Plant Pathogen-Wood Saprotroph	NULL	NULL	Possible	NULL	b'Duncan CG, Eslyn WE. 1966. Mycologia 58:642-645; Jumpponen A, Trappe J. 1998. New Phytologist 140:295-310; Rinaldi AC, et al. 2008. Fungal Diversity 33:1-45; Tedersoo L, et al. 2014. Science 346:1256688'
ISV_1101	k__Fungi;p__Ascomycota;c__Sordariomycetes;o__Xylariales;f__Xylariaceae;g__Nemania;s__Nemania_abortiva	Nemania	13	Saprotroph	Undefined Saprotroph	NULL	NULL	Probable	NULL	b'Tedersoo L, et al. 2014. Science 346:1256688'
ISV_1105	k__Fungi;p__Basidiomycota;c__Agaricomycetes;o__Agaricales;f__Hydnangiaceae;g__Laccaria;s__unclassified_Laccaria	Laccaria	13	Symbiotroph	Ectomycorrhizal	Agaricoid	NULL	Highly Probable	NULL	b'Rinaldi AC, et al. 2008. Fungal Diversity 33:1-45; Tedersoo L, et al. 2010. Mycorrhiza 20:217-263; http://mycorrhizas.info/ecmf.html'
ISV_1109	k__Fungi;p__Basidiomycota;c__Agaricomycetes;o__Boletales;f__Boletaceae;g__Leccinum;s__Leccinum_talamancae	Leccinum	13	Symbiotroph	Ectomycorrhizal	Boletoid	NULL	Highly Probable	NULL	b'Rinaldi AC, et al. 2008. Fungal Diversity 33:1-45; Tedersoo L, et al. 2010. Mycorrhiza 20:217-263; http://mycorrhizas.info/ecmf.html'
ISV_1110	k__Fungi;p__Mortierellomycota;c__Mortierellomycetes;o__Mortierellales;f__Mortierellaceae;g__Mortierella;s__Mortierella_globulifera	Mortierellaceae	9	Saprotroph-Symbiotroph	Endophyte-Litter Saprotroph-Soil Saprotroph-Undefined Saprotroph	Microfungus	NULL	Possible	Saprobic in soil and thus frequenctly isolated from soil and material contaminated with soil such as hay or rotten silage and spoil tips (Cannon & Kirk 2007)	b'Cannon PF, Kirk PM. 2007. Fungal Families of the World. CAB International, Cambridge; Purahong W, et al. 2016. Molecular Ecology 25:4059-4074'
ISV_1111	k__Fungi;p__Basidiomycota;c__Agaricomycetes;o__Agaricales;f__Psathyrellaceae;g__Coprinopsis;s__Coprinopsis_laanii	Psathyrellaceae	9	Saprotroph	Dung Saprotroph-Plant Saprotroph-Wood Saprotroph	Agaricoid	NULL	Probable	Saprobic, in grass, on dung, rotten wood and similar substrata (Cannon & Kirk 2007)	b'Cannon PF, Kirk PM. 2007. Fungal Families of the World. CAB International, Cambridge'
ISV_1112	k__Fungi;p__Basidiomycota;c__Agaricomycetes;o__Trechisporales;f__Hydnodontaceae;g__Trechispora;s__unclassified_Trechispora	Trechispora	13	Saprotroph	Wood Saprotroph	Corticioid	White Rot	Highly Probable	NULL	b'Gilbertson RL, Ryvarden L. 1987-1987. North American Polypores. Fungiflora, Oslo; Rinaldi AC, et al. 2008. Fungal Diversity 33:1-45 Uncertain.; Tedersoo L, et al. 2010. Mycorrhiza 20:217-263 (not ECM).'
ISV_1122	k__Fungi;p__Basidiomycota;c__Agaricomycetes;o__Russulales;f__Russulaceae;g__Russula;s__Russula_sp	Russula	13	Symbiotroph	Ectomycorrhizal	Agaricoid	NULL	Highly Probable	NULL	b'Rinaldi AC, et al. 2008. Fungal Diversity 33:1-45; Tedersoo L, et al. 2010. Mycorrhiza 20:217-263; http://mycorrhizas.info/ecmf.html'
ISV_1126	k__Fungi;p__Ascomycota;c__Eurotiomycetes;o__Onygenales;f__Onygenales_fam_Incertae_sedis;g__Arthropsis;s__Arthropsis_truncata	Arthropsis	13	Pathotroph-Saprotroph	Animal Pathogen-Undefined Saprotroph	Microfungus	NULL	Probable	Keratinophilic or from plant material and marine sediments, also human pathogens (Giraldo et al. 2013)	b'Giraldo A, et al. 2013. Mycopathologia 175:115-121'
ISV_1128	k__Fungi;p__Basidiomycota;c__Agaricomycetes;o__Agaricales;f__Hydnangiaceae;g__Laccaria;s__unclassified_Laccaria	Laccaria	13	Symbiotroph	Ectomycorrhizal	Agaricoid	NULL	Highly Probable	NULL	b'Rinaldi AC, et al. 2008. Fungal Diversity 33:1-45; Tedersoo L, et al. 2010. Mycorrhiza 20:217-263; http://mycorrhizas.info/ecmf.html'
ISV_1142	k__Fungi;p__Glomeromycota;c__Glomeromycetes;o__Diversisporales;f__Acaulosporaceae;g__Acaulospora;s__unclassified_Acaulospora	Acaulospora	13	Symbiotroph	Arbuscular Mycorrhizal	NULL	NULL	Highly Probable	NULL	b'Redecker D, et al. 2013. Mycorrhiza 23:515-531'
ISV_1157	k__Fungi;p__Ascomycota;c__Sordariomycetes;o__Sordariales;f__Chaetomiaceae;g__Chaetomium;s__Chaetomium_sp	Chaetomium	13	Pathotroph-Saprotroph-Symbiotroph	Animal Pathogen-Dung Saprotroph-Endophyte-Epiphyte-Plant Saprotroph-Wood Saprotroph	Microfungus	Soft Rot	Possible	Saprobic, acting as key decay organisms of plant materials and plant-derived commodities (Cannon & Kirk 2007); Epiphyte detection method-culture (Massimo et al. 2015); Endophyte detection method-culture (Busby et al. 2016, David et al. 2016); Likely opportunistic human pathogen (Irinyi et al. 2015)	b'Seehann G, et al. 1975. List of Fungi in Soft-Rot Tissue Tests. Institute fur Holzbiologie und Holzschutz, Bundesforschungsanstalt fur Forst - und Holzwirtshaft, Hamburg - Lohbrugge, Germany; Cannon PF, Kirk PM. 2007. Fungal Families of the World. CAB International, Cambridge; Bills GF, et al. 2013. Current Opinion in microbiology, 16:549-565; Tedersoo L, et al. 2014. Science 346:1256688; Iriny…
ISV_1164	k__Fungi;p__Ascomycota;c__Leotiomycetes;o__Helotiales;f__Dermateaceae;g__Pezicula;s__unclassified_Pezicula	Pezicula	13	Pathotroph-Saprotroph	Endophyte-Plant Pathogen-Undefined Saprotroph	NULL	NULL	Probable	Most species in Pezicula are only known as saprobes or harmless endophytes, and occasionally as weak plant pathogens.	b'Chen C, et al. 2015. Fungal Biology 10.1016/j.funbio.2015.09.013; Tedersoo L, et al. 2014. Science 346:1256688'
ISV_1168	k__Fungi;p__Basidiomycota;c__Agaricomycetes;o__Polyporales;f__Polyporaceae;g__Grammothele;s__Grammothele_sp	Polyporaceae	9	Saprotroph	Wood Saprotroph	Polyporoid	Brown Rot-White Rot	Probable	Lignicolous, causing brown or white rot, mostly of broadleaved trees (Cannon & Kirk 2007)	b'Cannon PF, Kirk PM. 2007. Fungal Families of the World. CAB International, Cambridge'
ISV_1174	k__Fungi;p__Basidiomycota;c__Agaricomycetes;o__Polyporales;f__Meruliaceae;g__Aurantiopileus;s__Aurantiopileus_mayaensis	Aurantiopileus	13	Saprotroph	Undefined Saprotroph	NULL	White Rot	Probable	NULL	b'Tedersoo L, et al. 2014. Science 346:1256688'
ISV_1176	k__Fungi;p__Ascomycota;c__Sordariomycetes;o__Hypocreales;f__unidentified_1250;g__unidentified_1078;s__Hypocreales_sp	Hypocreales	7	Saprotroph	Undefined Saprotroph	Microfungus	NULL	Possible	NULL	b'Sterkenburg E, et al. 2015. New Phytologist 207:1145-1158'
ISV_1177	k__Fungi;p__Ascomycota;c__Sordariomycetes;o__Xylariales;f__Xylariaceae;g__Xylaria;s__unclassified_Xylaria	Xylaria	13	Saprotroph-Symbiotroph	Endophyte-Undefined Saprotroph-Wood Saprotroph	Xylarioid	Soft Rot	Probable	NULL	b'Duncan CG, Eslyn WE. 1966. Mycologia 58:642-645; Costa IPMW, et al. 2012. Mycotaxon 119:26; http://www.apsnet.org/publications/commonnames/Pages/default.aspx'
ISV_1179	k__Fungi;p__Ascomycota;c__Sordariomycetes;o__Sordariales;f__Sordariaceae;g__Gelasinospora;s__unclassified_Gelasinospora	Gelasinospora	13	Saprotroph	Undefined Saprotroph	NULL	NULL	Probable	NULL	b'Tedersoo L, et al. 2014. Science 346:1256688'
ISV_118	k__Fungi;p__Ascomycota;c__Saccharomycetes;o__Saccharomycetales;f__Saccharomycetales_fam_Incertae_sedis;g__Nadsonia;s__unclassified_Nadsonia	Saccharomycetales	7	Saprotroph	Undefined Saprotroph	Yeast	NULL	Possible	NULL	b'Sterkenburg E, et al. 2015. New Phytologist 207:1145-1158'
ISV_1184	k__Fungi;p__Ascomycota;c__Dothideomycetes;o__Pleosporales;f__Didymosphaeriaceae;g__Paraphaeosphaeria;s__unclassified_Paraphaeosphaeria	Paraphaeosphaeria	13	Saprotroph	Undefined Saprotroph	NULL	NULL	Probable	NULL	b'Tedersoo L, et al. 2014. Science 346:1256688'
ISV_1187	k__Fungi;p__Ascomycota;c__Sordariomycetes;o__Hypocreales;f__Stachybotryaceae;g__Sirastachys;s__unclassified_Sirastachys	Hypocreales	7	Saprotroph	Undefined Saprotroph	Microfungus	NULL	Possible	NULL	b'Sterkenburg E, et al. 2015. New Phytologist 207:1145-1158'
ISV_1189	k__Fungi;p__Ascomycota;c__Sordariomycetes;o__Hypocreales;f__Hypocreaceae;g__Trichoderma;s__unclassified_Trichoderma	Hypocreales	7	Saprotroph	Undefined Saprotroph	Microfungus	NULL	Possible	NULL	b'Sterkenburg E, et al. 2015. New Phytologist 207:1145-1158'
ISV_1192	k__Fungi;p__Ascomycota;c__Sordariomycetes;o__Hypocreales;f__Hypocreaceae;g__Trichoderma;s__unclassified_Trichoderma	Hypocreales	7	Saprotroph	Undefined Saprotroph	Microfungus	NULL	Possible	NULL	b'Sterkenburg E, et al. 2015. New Phytologist 207:1145-1158'
ISV_1196	k__Fungi;p__Basidiomycota;c__Agaricomycetes;o__Polyporales;f__Fomitopsidaceae;g__Laetiporus;s__Laetiporus_sulphureus	Laetiporus	13	Saprotroph	Wood Saprotroph	Polyporoid	Brown Rot	Highly Probable	NULL	b'Gilbertson RL, Ryvarden L. 1987-1987. North American Polypores. Fungiflora, Oslo'
ISV_12	k__Fungi;p__Mortierellomycota;c__Mortierellomycetes;o__Mortierellales;f__Mortierellaceae;g__Mortierella;s__Mortierella_sp	Mortierellaceae	9	Saprotroph-Symbiotroph	Endophyte-Litter Saprotroph-Soil Saprotroph-Undefined Saprotroph	Microfungus	NULL	Possible	Saprobic in soil and thus frequenctly isolated from soil and material contaminated with soil such as hay or rotten silage and spoil tips (Cannon & Kirk 2007)	b'Cannon PF, Kirk PM. 2007. Fungal Families of the World. CAB International, Cambridge; Purahong W, et al. 2016. Molecular Ecology 25:4059-4074'
ISV_1210	k__Fungi;p__Ascomycota;c__Eurotiomycetes;o__Chaetothyriales;f__Herpotrichiellaceae;g__Cladophialophora;s__unclassified_Cladophialophora	Cladophialophora	13	Saprotroph	Undefined Saprotroph	Facultative Yeast	NULL	Probable	NULL	b'James TY, et al. 2006. Nature 443:818-822'
ISV_1213	k__Fungi;p__Basidiomycota;c__Agaricomycetes;o__Agaricales;f__Inocybaceae;g__Inocybe;s__Inocybe_sp	Inocybaceae	9	Symbiotroph	Ectomycorrhizal	Agaricoid	NULL	Probable	Sensu stricto with the exclusion of Crepidotaceae, Tubariaceae, and Chromocyphellaceae; Pharmacology: muscarine, psilocybin, aeruginascen, unclarified alkaloids, or none	b'Matheny PB. 2009. McIlvainea 18:11-21'
ISV_1223	k__Fungi;p__Ascomycota;c__Eurotiomycetes;o__Chaetothyriales;f__Herpotrichiellaceae;g__Capronia;s__Capronia_sp	Capronia	13	Symbiotroph	Endophyte	Facultative Yeast	NULL	Highly Probable	Dark Septate Endophyte, known from plant roots.	b'Tedersoo L, et al. 2014. Science 346:1256688'
ISV_1231	k__Fungi;p__Ascomycota;c__Eurotiomycetes;o__Eurotiales;f__Aspergillaceae;g__Penicillium;s__unclassified_Penicillium	Eurotiales	7	Saprotroph	Undefined Saprotroph	Microfungus	NULL	Possible	NULL	b'Sterkenburg E, et al. 2015. New Phytologist 207:1145-1158'
ISV_1238	k__Fungi;p__Ascomycota;c__Sordariomycetes;o__Hypocreales;f__Hypocreaceae;g__Hypomyces;s__Hypomyces_chrysospermus	Hypocreales	7	Saprotroph	Undefined Saprotroph	Microfungus	NULL	Possible	NULL	b'Sterkenburg E, et al. 2015. New Phytologist 207:1145-1158'
ISV_1242	k__Fungi;p__Ascomycota;c__Leotiomycetes;o__Helotiales;f__Hyaloscyphaceae;g__Hyaloscypha;s__Hyaloscypha_albohyalina	Hyaloscypha	13	Saprotroph	Undefined Saprotroph	NULL	NULL	Probable	NULL	b'Tedersoo L, et al. 2014. Science 346:1256688'
ISV_1245	k__Fungi;p__Basidiomycota;c__Agaricomycetes;o__Agaricales;f__Lyophyllaceae;g__Asterophora;s__Asterophora_parasitica	Asterophora	13	Pathotroph	Fungal Parasite	NULL	NULL	Highly Probable	NULL	b'List compiled by John Plischke III (http://home.comcast.net/~grifola/fungionfungi.pdf)'
ISV_1249	k__Fungi;p__Basidiomycota;c__Agaricomycetes;o__Trechisporales;f__Hydnodontaceae;g__Trechispora;s__unclassified_Trechispora	Trechispora	13	Saprotroph	Wood Saprotroph	Corticioid	White Rot	Highly Probable	NULL	b'Gilbertson RL, Ryvarden L. 1987-1987. North American Polypores. Fungiflora, Oslo; Rinaldi AC, et al. 2008. Fungal Diversity 33:1-45 Uncertain.; Tedersoo L, et al. 2010. Mycorrhiza 20:217-263 (not ECM).'
ISV_1253	k__Fungi;p__Basidiomycota;c__Agaricomycetes;o__Russulales;f__Hericiaceae;g__Dentipellis;s__Dentipellis_fragilis	Dentipellis	13	Saprotroph	Undefined Saprotroph	Hydnoid	White Rot	Probable	NULL	b'Tedersoo L, et al. 2014. Science 346:1256688'
ISV_127	k__Fungi;p__Mortierellomycota;c__Mortierellomycetes;o__Mortierellales;f__Mortierellaceae;g__Dissophora;s__Dissophora_ornata	Dissophora	13	Saprotroph	Undefined Saprotroph	NULL	NULL	Probable	NULL	b'Tedersoo L, et al. 2014. Science 346:1256688'
ISV_1278	k__Fungi;p__Basidiomycota;c__Agaricomycetes;o__Agaricales;f__Cortinariaceae;g__Phaeocollybia;s__unclassified_Phaeocollybia	Phaeocollybia	13	Symbiotroph	Ectomycorrhizal	NULL	NULL	Possible	NULL	b'http://mycorrhizas.info/ecmf.html'
ISV_1282	k__Fungi;p__Ascomycota;c__Sordariomycetes;o__Hypocreales;f__Nectriaceae;g__Calcarisporium;s__Calcarisporium_arbuscula	Calcarisporium	13	Pathotroph	Fungal Parasite	NULL	NULL	Probable	NULL	b'Tedersoo L, et al. 2014. Science 346:1256688'
ISV_1288	k__Fungi;p__Ascomycota;c__Sordariomycetes;o__Hypocreales;f__Ophiocordycipitaceae;g__Hirsutella;s__unclassified_Hirsutella	Hirsutella	13	Pathotroph	Animal Pathogen	NULL	NULL	Probable	NULL	b'Tedersoo L, et al. 2014. Science 346:1256688'
ISV_13	k__Fungi;p__Ascomycota;c__Archaeorhizomycetes;o__Archaeorhizomycetales;f__Archaeorhizomycetaceae;g__Archaeorhizomyces;s__Archaeorhizomyces_sp	Archaeorhizomyces	13	Saprotroph	Soil Saprotroph	Microfungus	NULL	Probable	From rhizosphere soil and coniferous ectomycorrhizal root tips (Rosling et al. 2011)	b'Rosling A, et al. 2011. Science 333:876-879'
ISV_1300	k__Fungi;p__Basidiomycota;c__Agaricomycetes;o__Russulales;f__Russulaceae;g__Russula;s__unclassified_Russula	Russula	13	Symbiotroph	Ectomycorrhizal	Agaricoid	NULL	Highly Probable	NULL	b'Rinaldi AC, et al. 2008. Fungal Diversity 33:1-45; Tedersoo L, et al. 2010. Mycorrhiza 20:217-263; http://mycorrhizas.info/ecmf.html'
ISV_1304	k__Fungi;p__Basidiomycota;c__Agaricomycetes;o__Thelephorales;f__Thelephoraceae;g__unidentified;s__Thelephoraceae_sp	Thelephoraceae	9	Saprotroph-Symbiotroph	Ectomycorrhizal-Undefined Saprotroph	Clavarioid	NULL	Probable	On the ground, on soil, a few on wood. At least some speices ectomycorrhizal (Cannon & Kirk 2007)	b'Cannon PF, Kirk PM. 2007. Fungal Families of the World. CAB International, Cambridge'
ISV_131	k__Fungi;p__Glomeromycota;c__Glomeromycetes;o__Glomerales;f__Glomeraceae;g__unidentified_1315;s__Glomeraceae_sp	Glomeraceae	9	Symbiotroph	Arbuscular Mycorrhizal	NULL	NULL	Highly Probable	NULL	b'Redecker D, et al. 2013. Mycorrhiza 23:515-531'
ISV_1310	k__Fungi;p__Ascomycota;c__Leotiomycetes;o__Helotiales;f__Hyaloscyphaceae;g__Hyaloscypha;s__Hyaloscypha_sp	Hyaloscypha	13	Saprotroph	Undefined Saprotroph	NULL	NULL	Probable	NULL	b'Tedersoo L, et al. 2014. Science 346:1256688'
ISV_1325	k__Fungi;p__Basidiomycota;c__Agaricomycetes;o__Polyporales;f__Meruliaceae;g__Hydnopolyporus;s__Hydnopolyporus_fimbriatus	Hydnopolyporus	13	Pathotroph-Saprotroph	Plant Pathogen-Wood Saprotroph	Clavarioid	White Rot	Highly Probable	NULL	b'Gilbertson RL, Ryvarden L. 1987-1987. North American Polypores. Fungiflora, Oslo'
ISV_1349	k__Fungi;p__Basidiomycota;c__Agaricomycetes;o__Agaricales;f__Pleurotaceae;g__Nematoctonus;s__Nematoctonus_tylosporus	Nematoctonus	13	Saprotroph	Undefined Saprotroph	NULL	White Rot	Probable	NULL	b'Tedersoo L, et al. 2014. Science 346:1256688'
ISV_1355	k__Fungi;p__Basidiomycota;c__Agaricomycetes;o__Jaapiales;f__Jaapiaceae;g__Jaapia;s__Jaapia_ochroleuca	Jaapia	13	Saprotroph	Undefined Saprotroph	NULL	NULL	Probable	NULL	b'Tedersoo L, et al. 2014. Science 346:1256688'
ISV_1356	k__Fungi;p__Basidiomycota;c__Agaricomycetes;o__Trechisporales;f__Hydnodontaceae;g__Trechispora;s__Trechispora_sp	Trechispora	13	Saprotroph	Wood Saprotroph	Corticioid	White Rot	Highly Probable	NULL	b'Gilbertson RL, Ryvarden L. 1987-1987. North American Polypores. Fungiflora, Oslo; Rinaldi AC, et al. 2008. Fungal Diversity 33:1-45 Uncertain.; Tedersoo L, et al. 2010. Mycorrhiza 20:217-263 (not ECM).'
ISV_1359	k__Fungi;p__Ascomycota;c__Sordariomycetes;o__Xylariales;f__Xylariaceae;g__Kretzschmaria;s__Kretzschmaria_lucidula	Kretzschmaria	13	Saprotroph	Undefined Saprotroph	NULL	NULL	Probable	NULL	b'Tedersoo L, et al. 2014. Science 346:1256688'
ISV_1366	k__Fungi;p__Ascomycota;c__Sordariomycetes;o__Hypocreales;f__Hypocreaceae;g__Trichoderma;s__unclassified_Trichoderma	Hypocreales	7	Saprotroph	Undefined Saprotroph	Microfungus	NULL	Possible	NULL	b'Sterkenburg E, et al. 2015. New Phytologist 207:1145-1158'
ISV_1377	k__Fungi;p__Glomeromycota;c__Glomeromycetes;o__Diversisporales;f__Acaulosporaceae;g__Acaulospora;s__Acaulospora_lacunosa	Acaulospora	13	Symbiotroph	Arbuscular Mycorrhizal	NULL	NULL	Highly Probable	NULL	b'Redecker D, et al. 2013. Mycorrhiza 23:515-531'
ISV_1384	k__Fungi;p__Basidiomycota;c__Agaricomycetes;o__Agaricales;f__Psathyrellaceae;g__Psathyrella;s__unclassified_Psathyrella	Psathyrella	13	Saprotroph	Wood Saprotroph	Agaricoid	NULL	Probable	NULL	b'Tedersoo L, et al. 2014. Science 346:1256688'
ISV_1385	k__Fungi;p__Basidiomycota;c__Agaricomycetes;o__Cantharellales;f__Botryobasidiaceae;g__unidentified_1608;s__Botryobasidiaceae_sp	Botryobasidiaceae	9	Saprotroph	Undefined Saprotroph-Wood Saprotroph	Corticioid	NULL	Probable	Saprobic, typically on rotten wood (Cannon & Kirk 2007)	b'Cannon PF, Kirk PM. 2007. Fungal Families of the World. CAB International, Cambridge'
ISV_1386	k__Fungi;p__Basidiomycota;c__Agaricomycetes;o__Cantharellales;f__Cantharellaceae;g__unidentified_808;s__Cantharellaceae_sp	Cantharellaceae	9	Symbiotroph	Ectomycorrhizal	Agaricoid	NULL	Probable	Species form ectomycorrhizas with coniferous and broadleaved trees (Cannon & Kirk 2007)	b'Cannon PF, Kirk PM. 2007. Fungal Families of the World. CAB International, Cambridge'
ISV_1394	k__Fungi;p__Ascomycota;c__Leotiomycetes;o__Helotiales;f__Dermateaceae;g__Mollisia;s__Mollisia_sp	Mollisia	13	Pathotroph-Symbiotroph	Endophyte-Plant Pathogen	Microfungus	NULL	Probable	Dark Septate Endophyte, known from plant roots.	b'James TY, et al. 2006. Nature 443:818-822; Tedersoo L, et al. 2014. Science 346:1256688 (Plant Pathogen); Taylor DL, et al. 2014. Ecological Monographs 84:3-20 (as DSE)'
ISV_1406	k__Fungi;p__Basidiomycota;c__Agaricomycetes;o__Agaricales;f__Cortinariaceae;g__Cortinarius;s__unclassified_Cortinarius	Cortinarius	13	Symbiotroph	Ectomycorrhizal	Agaricoid	NULL	Highly Probable	NULL	b'Rinaldi AC, et al. 2008. Fungal Diversity 33:1-45; Tedersoo L, et al. 2010. Mycorrhiza 20:217-263; http://mycorrhizas.info/ecmf.html'
ISV_1408	k__Fungi;p__Ascomycota;c__Sordariomycetes;o__Xylariales;f__Microdochiaceae;g__Selenodriella;s__unclassified_Selenodriella	Microdochiaceae	9	Pathotroph-Saprotroph-Symbiotroph	Endophyte-Plant Pathogen-Undefined Saprotroph	Microfungus	NULL	Probable	Saprobic, endophytic or pathogenic; on leaves, seeds and soil (Cernández-Restrepo et al. 2016)	b'Hern\xc3\xa1ndez-Restrepo M, Groenewald JZ, Crous PW. 2016. Persoonia 36:57-82'
ISV_141	k__Fungi;p__Ascomycota;c__Leotiomycetes;o__Helotiales;f__Helotiaceae;g__Hymenoscyphus;s__Hymenoscyphus_sp	Hymenoscyphus	13	Pathotroph-Saprotroph-Symbiotroph	Bryophyte Parasite-Ectomycorrhizal-Ericoid Mycorrhizal-Undefined Saprotroph	Microfungus; Dark Septate Microfungus	NULL	Possible	Syn.: Pezoloma among other (see e.g., Pezoloma ericae)	b'Baral and Krieglsteiner 2006. Acta Mycologica 41:11-20 (as a bryophyte parasite); Huhtinen et al. 2010. Nova Hedwigia 90:413-431, Bent et al. 2011. Applied and Environmental Microbiology 77:3351-3359 (as ectomycorrhizae); Tedersoo L, et al. 2014. Science 346:1256688 (as saprotroph)'
ISV_1410	k__Fungi;p__Ascomycota;c__Dothideomycetes;o__Capnodiales;f__Mycosphaerellaceae;g__Pseudocercospora;s__unclassified_Pseudocercospora	Pseudocercospora	13	Pathotroph	Plant Pathogen	Microfungus	NULL	Probable	NULL	b'Tedersoo L, et al. 2014. Science 346:1256688'
ISV_1426	k__Fungi;p__Ascomycota;c__Eurotiomycetes;o__Chaetothyriales;f__Herpotrichiellaceae;g__Cladophialophora;s__unclassified_Cladophialophora	Cladophialophora	13	Saprotroph	Undefined Saprotroph	Facultative Yeast	NULL	Probable	NULL	b'James TY, et al. 2006. Nature 443:818-822'
ISV_1432	k__Fungi;p__Basidiomycota;c__Agaricomycetes;o__Hymenochaetales;f__Hymenochaetaceae;g__Hymenochaete;s__Hymenochaete_fulva	Hymenochaete	13	Saprotroph	Undefined Saprotroph	Corticioid	White Rot	Probable	NULL	b'Tedersoo L, et al. 2014. Science 346:1256688'
ISV_1441	k__Fungi;p__Basidiomycota;c__Tremellomycetes;o__Cystofilobasidiales;f__Cystofilobasidiaceae;g__Cystofilobasidium;s__unclassified_Cystofilobasidium	Cystofilobasidium	13	Saprotroph	Leaf Saprotroph	Yeast	NULL	Possible	NULL	b'Oberwinkler F, et al. 1983. Systematic and Applied Microbiology 4:114-122 (https://doi.org/10.1016/S0723-2020(83)80039-3)'
ISV_1446	k__Fungi;p__Ascomycota;c__Leotiomycetes;o__Helotiales;f__Helotiales_fam_Incertae_sedis;g__Chalara;s__Chalara_hughesii	Chalara	13	Pathotroph-Saprotroph-Symbiotroph	Endophyte-Plant Pathogen-Wood Saprotroph	NULL	Soft Rot	Probable	NULL	b'Duncan CG, Eslyn WE. 1966. Mycologia 58:642-645; Tedersoo L, et al. 2014. Science 346:1256688'
ISV_1461	k__Fungi;p__Ascomycota;c__Sordariomycetes;o__Hypocreales;f__Nectriaceae;g__Thelonectria;s__unclassified_Thelonectria	Thelonectria	13	Saprotroph	Leaf Saprotroph	NULL	NULL	Highly Probable	NULL	b'Tedersoo L, et al. 2014. Science 346:1256688; Salgado-Salazar et al. 2013. PLoS ONE 8,e76737'
ISV_1471	k__Fungi;p__Basidiomycota;c__Agaricomycetes;o__Agaricales;f__Strophariaceae;g__Psilocybe;s__Psilocybe_australiana	Psilocybe	13	Saprotroph	Undefined Saprotroph	Agaricoid	Poisonous	Probable	NULL	b'Tedersoo L, et al. 2014. Science 346:1256688'
ISV_1473	k__Fungi;p__Basidiomycota;c__Agaricomycetes;o__Cantharellales;f__Cantharellaceae;g__Cantharellus;s__Cantharellus_decolorans	Cantharellus	13	Symbiotroph	Ectomycorrhizal	Cantherelloid	NULL	Highly Probable	NULL	b'Tedersoo L, et al. 2014. Science 346:1256688'
ISV_1475	k__Fungi;p__Glomeromycota;c__unidentified_29935;o__unidentified_29765;f__unidentified_29299;g__unidentified_25828;s__Glomeromycotina	Glomeromycota	3	Symbiotroph	Arbuscular Mycorrhizal	NULL	NULL	Highly Probable	NULL	b'Redecker D, et al. 2013. Mycorrhiza 23:515-531'
ISV_1477	k__Fungi;p__Basidiomycota;c__Agaricomycetes;o__Russulales;f__Russulaceae;g__Lactarius;s__unclassified_Lactarius	Lactarius	13	Symbiotroph	Ectomycorrhizal	Agaricoid	NULL	Highly Probable	Common name - milk-cap	b'Rinaldi AC, et al. 2008. Fungal Diversity 33:1-45; Tedersoo L, et al. 2010. Mycorrhiza 20:217-263; http://mycorrhizas.info/ecmf.html'
ISV_1482	k__Fungi;p__Basidiomycota;c__Agaricomycetes;o__Agaricales;f__Agaricaceae;g__Agaricus;s__unclassified_Agaricus	Agaricaceae	9	Saprotroph	Undefined Saprotroph	Agaricoid-Gasteroid-Secotioid	NULL	Probable	Primarily saprobes in grassland and woodland situations (Cannon & Kirk 2007)	b'Cannon PF, Kirk PM. 2007. Fungal Families of the World. CAB International, Cambridge'
ISV_1486	k__Fungi;p__Ascomycota;c__Dothideomycetes;o__Venturiales;f__Sympoventuriaceae;g__Ochroconis;s__unclassified_Ochroconis	Sympoventuriaceae	9	Saprotroph	Undefined Saprotroph	Microfungus	NULL	Probable	Sympoventuriaceae is represented by Sympoventuria, and can be distinguished from species of Venturiales by its saprobic life style (Zhang et al. 2011)	b'Zhang Y, et al. 2011 Fungal Diversity 51:249-277'
ISV_1493	k__Fungi;p__Ascomycota;c__Sordariomycetes;o__Hypocreales;f__Ophiocordycipitaceae;g__Tolypocladium;s__Tolypocladium_sp	Tolypocladium	13	Pathotroph-Symbiotroph	Animal Pathogen-Clavicipitaceous Endophyte-Fungal Parasite	NULL	NULL	Possible	Endophyte detection method-culture (Gazis et al. 2014)	b'Gazis R, et al. 2014. Mycologia 106:1090-105; Tedersoo L, et al. 2014. Science 346:1256688; Quant CA. 2014. IMA Fungus. 5: 121-134'
ISV_1510	k__Fungi;p__Ascomycota;c__Sordariomycetes;o__Xylariales;f__Xylariaceae;g__Nemania;s__Nemania_sp	Nemania	13	Saprotroph	Undefined Saprotroph	NULL	NULL	Probable	NULL	b'Tedersoo L, et al. 2014. Science 346:1256688'
ISV_1518	k__Fungi;p__Basidiomycota;c__Agaricomycetes;o__Agaricales;f__Tricholomataceae;g__Campanophyllum;s__Campanophyllum_proboscideum	Campanophyllum	13	Saprotroph	Undefined Saprotroph	NULL	NULL	Probable	NULL	b'Tedersoo L, et al. 2014. Science 346:1256688'
ISV_1521	k__Fungi;p__Mortierellomycota;c__Mortierellomycetes;o__Mortierellales;f__Mortierellaceae;g__Mortierella;s__Mortierella_sp	Mortierellaceae	9	Saprotroph-Symbiotroph	Endophyte-Litter Saprotroph-Soil Saprotroph-Undefined Saprotroph	Microfungus	NULL	Possible	Saprobic in soil and thus frequenctly isolated from soil and material contaminated with soil such as hay or rotten silage and spoil tips (Cannon & Kirk 2007)	b'Cannon PF, Kirk PM. 2007. Fungal Families of the World. CAB International, Cambridge; Purahong W, et al. 2016. Molecular Ecology 25:4059-4074'
ISV_1524	k__Fungi;p__Ascomycota;c__Sordariomycetes;o__Hypocreales;f__Nectriaceae;g__Volutella;s__Volutella_consors	Volutella	13	Pathotroph	Plant Pathogen	NULL	NULL	Probable	NULL	b'Tedersoo L, et al. 2014. Science 346:1256688 (doi:10.1126/science.1256688)'
ISV_1526	k__Fungi;p__Basidiomycota;c__Agaricomycetes;o__Thelephorales;f__Thelephoraceae;g__Tomentella;s__unclassified_Tomentella	Tomentella	13	Symbiotroph	Ectomycorrhizal	Corticioid	NULL	Highly Probable	NULL	b'Rinaldi AC, et al. 2008. Fungal Diversity 33:1-45; Tedersoo L, et al. 2010. Mycorrhiza 20:217-263; http://mycorrhizas.info/ecmf.html'
ISV_1528	k__Fungi;p__Ascomycota;c__Saccharomycetes;o__Saccharomycetales;f__Saccharomycetales_fam_Incertae_sedis;g__Candida;s__Candida_sophiae-reginae	Saccharomycetales	7	Saprotroph	Undefined Saprotroph	Yeast	NULL	Possible	NULL	b'Sterkenburg E, et al. 2015. New Phytologist 207:1145-1158'
ISV_1530	k__Fungi;p__Basidiomycota;c__Agaricomycetes;o__Russulales;f__Peniophoraceae;g__unidentified_3299;s__Peniophoraceae_sp	Peniophoraceae	9	Pathotroph-Saprotroph	Plant Pathogen-Wood Saprotroph	Corticioid	White Rot	Probable	Most species are saprobic, causing rots of standing and fallen wood. Many species are adapted to xeric conditions, being able to grow on rapidly drying dead attached branches (Cannon & Kirk 2007)	b'Cannon PF, Kirk PM. 2007. Fungal Families of the World. CAB International, Cambridge'
ISV_1532	k__Fungi;p__Ascomycota;c__Dothideomycetes;o__Capnodiales;f__Cladosporiaceae;g__Rachicladosporium;s__Rachicladosporium_pini	Cladosporiaceae	9	Pathotroph-Saprotroph-Symbiotroph	Animal Pathogen-Endophyte-Lichen Parasite-Plant Pathogen-Wood Saprotroph	Microfungus	NULL	Possible	NULL	b'Seehann G, et al. 1975. List of Fungi in Soft-Rot Tissue Tests. Institute fur Holzbiologie und Holzschutz, Bundesforschungsanstalt fur Forst - und Holzwirtshaft, Hamburg - Lohbrugge, Germany; Lawrey JD, Diederich P. 2016. URL: http://www.lichenicolous.net [24 May 2017]; http://www.apsnet.org/publications/commonnames/Pages/default.aspx'
ISV_154	k__Fungi;p__Mortierellomycota;c__Mortierellomycetes;o__Mortierellales;f__Mortierellaceae;g__Mortierella;s__unclassified_Mortierella	Mortierellaceae	9	Saprotroph-Symbiotroph	Endophyte-Litter Saprotroph-Soil Saprotroph-Undefined Saprotroph	Microfungus	NULL	Possible	Saprobic in soil and thus frequenctly isolated from soil and material contaminated with soil such as hay or rotten silage and spoil tips (Cannon & Kirk 2007)	b'Cannon PF, Kirk PM. 2007. Fungal Families of the World. CAB International, Cambridge; Purahong W, et al. 2016. Molecular Ecology 25:4059-4074'
ISV_1547	k__Fungi;p__Basidiomycota;c__Agaricomycetes;o__Polyporales;f__Ganodermataceae;g__Ganoderma;s__Ganoderma_sp	Ganodermataceae	9	Pathotroph-Saprotroph	Plant Pathogen-Wood Saprotroph	Polyporoid	White Rot	Probable	Lignicolous, causing sometimes agressive white rots of timber (Cannon & Kirk 2007)	b'Cannon PF, Kirk PM. 2007. Fungal Families of the World. CAB International, Cambridge'
ISV_155	k__Fungi;p__Ascomycota;c__Dothideomycetes;o__Capnodiales;f__Cladosporiaceae;g__Cladosporium;s__unclassified_Cladosporium	Cladosporium	13	Pathotroph-Saprotroph-Symbiotroph	Animal Pathogen-Endophyte-Lichen Parasite-Plant Pathogen-Wood Saprotroph	Microfungus	NULL	Possible	NULL	b'Seehann G, et al. 1975. List of Fungi in Soft-Rot Tissue Tests. Institute fur Holzbiologie und Holzschutz, Bundesforschungsanstalt fur Forst - und Holzwirtshaft, Hamburg - Lohbrugge, Germany; Lawrey JD, Diederich P. 2016. URL: http://www.lichenicolous.net [24 May 2017]; http://www.apsnet.org/publications/commonnames/Pages/default.aspx'
ISV_1557	k__Fungi;p__Ascomycota;c__Sordariomycetes;o__Hypocreales;f__Cordycipitaceae;g__Lecanicillium;s__Lecanicillium_fungicola	Lecanicillium	13	Pathotroph	Animal Pathogen	NULL	NULL	Probable	NULL	b'Tedersoo L, et al. 2014. Science 346:1256688'
ISV_1560	k__Fungi;p__Basidiomycota;c__Agaricomycetes;o__Agaricales;f__Strophariaceae;g__Hypholoma;s__unclassified_Hypholoma	Hypholoma	13	Saprotroph	Undefined Saprotroph	Agaricoid	White Rot	Probable	NULL	b'Tedersoo L, et al. 2014. Science 346:1256688'
ISV_1574	k__Fungi;p__Ascomycota;c__Leotiomycetes;o__Helotiales;f__Hyaloscyphaceae;g__Calycina;s__unclassified_Calycina	Calycina	13	Saprotroph	Undefined Saprotroph	NULL	NULL	Probable	NULL	b'Tedersoo L, et al. 2014. Science 346:1256688'
ISV_1578	k__Fungi;p__Ascomycota;c__Sordariomycetes;o__Hypocreales;f__Bionectriaceae;g__Bionectria;s__unclassified_Bionectria	Bionectria	13	Pathotroph-Saprotroph	Fungal Parasite-Undefined Saprotroph	Microfungus	NULL	Probable	NULL	b'Tedersoo L, et al. 2014. Science 346:1256688'
ISV_1579	k__Fungi;p__Basidiomycota;c__Agaricomycetes;o__Polyporales;f__Fomitopsidaceae;g__Postia;s__Postia_sp	Postia	13	Saprotroph	Wood Saprotroph	Polyporoid	Brown Rot	Highly Probable	NULL	b'Jordan CR, et al. 1996. Holzforschung - International Journal of the Biology, Chemistry, Physics and Technology of Wood 50:312-318'
ISV_1585	k__Fungi;p__Basidiomycota;c__Agaricomycetes;o__Hymenochaetales;f__Hymenochaetaceae;g__Inocutis;s__unclassified_Inocutis	Inocutis	13	Saprotroph	Undefined Saprotroph	Polyporoid	White Rot	Probable	NULL	b'Tedersoo L, et al. 2014. Science 346:1256688'
ISV_1599	k__Fungi;p__Ascomycota;c__Sordariomycetes;o__Xylariales;f__Xylariaceae;g__Xylaria;s__unclassified_Xylaria	Xylaria	13	Saprotroph-Symbiotroph	Endophyte-Undefined Saprotroph-Wood Saprotroph	Xylarioid	Soft Rot	Probable	NULL	b'Duncan CG, Eslyn WE. 1966. Mycologia 58:642-645; Costa IPMW, et al. 2012. Mycotaxon 119:26; http://www.apsnet.org/publications/commonnames/Pages/default.aspx'
ISV_1600	k__Fungi;p__Basidiomycota;c__Agaricomycetes;o__Agaricales;f__Tricholomataceae;g__Mycena;s__Mycena_sp	Mycena	13	Pathotroph-Saprotroph	Leaf Saprotroph-Plant Pathogen-Undefined Saprotroph-Wood Saprotroph	Agaricoid	NULL	Probable	NULL	b'Grgurinovic CA, Simpson JA. 2001. Fungal Diversity 8:97-127; Tedersoo L, et al. 2014. Science 346:1256688; http://www.apsnet.org/publications/commonnames/Pages/default.aspx'
ISV_1605	k__Fungi;p__Ascomycota;c__Sordariomycetes;o__Xylariales;f__Xylariaceae;g__Biscogniauxia;s__Biscogniauxia_sp	Biscogniauxia	13	Saprotroph	Undefined Saprotroph	NULL	NULL	Probable	NULL	b'Tedersoo L, et al. 2014. Science 346:1256688'
ISV_1613	k__Fungi;p__Ascomycota;c__Eurotiomycetes;o__Eurotiales;f__Aspergillaceae;g__Penicillium;s__unclassified_Penicillium	Eurotiales	7	Saprotroph	Undefined Saprotroph	Microfungus	NULL	Possible	NULL	b'Sterkenburg E, et al. 2015. New Phytologist 207:1145-1158'
ISV_1616	k__Fungi;p__Ascomycota;c__Leotiomycetes;o__Helotiales;f__Leotiaceae;g__Neobulgaria;s__Neobulgaria_alba	Neobulgaria	13	Saprotroph	Undefined Saprotroph	NULL	NULL	Probable	NULL	b'Tedersoo L, et al. 2014. Science 346:1256688'
ISV_1619	k__Fungi;p__Ascomycota;c__Sordariomycetes;o__Hypocreales;f__Hypocreales_fam_Incertae_sedis;g__Acremonium;s__Acremonium_parvum	Acremonium	13	Pathotroph-Saprotroph-Symbiotroph	Animal Pathogen-Endophyte-Fungal Parasite-Plant Pathogen-Wood Saprotroph	Microfungus	Soft Rot	Possible	Endophyte detection method-culture (Hanada et al. 2010, Del Olmo-Ruiz & Arnold 2014); Likely opportunistic human pathogen (Irinyi et al. 2015)	b'Duncan CG, Eslyn WE. 1966. Mycologia 58:642-64; Nilsson T. 1973. Studies on wood degradation and cellulolytic activity of microfungi. No. 104; Worrall JJ, et al. 1997. Mycologia 89: 199-219; Hanada RE, et al. 2010. Fungal Biology 114:901-910; Del Olmo-Ruiz M, Arnold AE. 2014. Mycologia 106:8-21; Tedersoo L, et al. 2014. Science 346:1256688; Irinyi L, et al. 2015. Medical Mycology 53:313-337'
ISV_1624	k__Fungi;p__Basidiomycota;c__Agaricomycetes;o__Agaricales;f__Cortinariaceae;g__Cortinarius;s__unclassified_Cortinarius	Cortinarius	13	Symbiotroph	Ectomycorrhizal	Agaricoid	NULL	Highly Probable	NULL	b'Rinaldi AC, et al. 2008. Fungal Diversity 33:1-45; Tedersoo L, et al. 2010. Mycorrhiza 20:217-263; http://mycorrhizas.info/ecmf.html'
ISV_1625	k__Fungi;p__Basidiomycota;c__Agaricomycetes;o__Agaricales;f__Tricholomataceae;g__Hydropus;s__unclassified_Hydropus	Hydropus	13	Saprotroph	Undefined Saprotroph	NULL	NULL	Probable	NULL	b'Tedersoo L, et al. 2014. Science 346:1256688'
ISV_1632	k__Fungi;p__Ascomycota;c__Leotiomycetes;o__Helotiales;f__Hyaloscyphaceae;g__Hyaloscypha;s__Hyaloscypha_sp	Hyaloscypha	13	Saprotroph	Undefined Saprotroph	NULL	NULL	Probable	NULL	b'Tedersoo L, et al. 2014. Science 346:1256688'
ISV_1636	k__Fungi;p__Ascomycota;c__Sordariomycetes;o__Glomerellales;f__Glomerellaceae;g__Colletotrichum;s__unclassified_Colletotrichum	Colletotrichum	13	Pathotroph-Symbiotroph	Endophyte-Plant Pathogen	Microfungus	NULL	Probable	NULL	b'Costa IPMW, et al. 2012. Mycotaxon 119:26; Tedersoo L, et al. 2014. Science 346:1256688; http://www.apsnet.org/publications/commonnames/Pages/default.aspx'
ISV_164	k__Fungi;p__Basidiomycota;c__Agaricomycetes;o__Polyporales;f__Ganodermataceae;g__Ganoderma;s__Ganoderma_sp	Ganodermataceae	9	Pathotroph-Saprotroph	Plant Pathogen-Wood Saprotroph	Polyporoid	White Rot	Probable	Lignicolous, causing sometimes agressive white rots of timber (Cannon & Kirk 2007)	b'Cannon PF, Kirk PM. 2007. Fungal Families of the World. CAB International, Cambridge'
ISV_1644	k__Fungi;p__Basidiomycota;c__Agaricomycetes;o__Polyporales;f__Polyporaceae;g__Datronia;s__Datronia_mollis	Polyporaceae	9	Saprotroph	Wood Saprotroph	Polyporoid	Brown Rot-White Rot	Probable	Lignicolous, causing brown or white rot, mostly of broadleaved trees (Cannon & Kirk 2007)	b'Cannon PF, Kirk PM. 2007. Fungal Families of the World. CAB International, Cambridge'
ISV_1648	k__Fungi;p__Basidiomycota;c__Agaricomycetes;o__Agaricales;f__Psathyrellaceae;g__Psathyrella;s__unclassified_Psathyrella	Psathyrella	13	Saprotroph	Wood Saprotroph	Agaricoid	NULL	Probable	NULL	b'Tedersoo L, et al. 2014. Science 346:1256688'
ISV_1652	k__Fungi;p__Basidiomycota;c__Agaricomycetes;o__Polyporales;f__Steccherinaceae;g__Junghuhnia;s__Junghuhnia_subundata	Junghuhnia	13	Saprotroph	Wood Saprotroph	Corticioid	White Rot	Highly Probable	NULL	b'Gilbertson RL, Ryvarden L. 1987-1987. North American Polypores. Fungiflora, Oslo'
ISV_1658	k__Fungi;p__Basidiomycota;c__Agaricomycetes;o__Hymenochaetales;f__Hymenochaetaceae;g__Hymenochaete;s__unclassified_Hymenochaete	Hymenochaete	13	Saprotroph	Undefined Saprotroph	Corticioid	White Rot	Probable	NULL	b'Tedersoo L, et al. 2014. Science 346:1256688'
ISV_1661	k__Fungi;p__Ascomycota;c__Leotiomycetes;o__Helotiales;f__Hyaloscyphaceae;g__Hyphodiscus;s__Hyphodiscus_sp	Hyphodiscus	13	Pathotroph	Fungal Parasite	Microfungus	NULL	Highly Probable	NULL	b'List compiled by John Plischke III (http://home.comcast.net/~grifola/fungionfungi.pdf)'
ISV_1674	k__Fungi;p__Basidiomycota;c__Agaricomycetes;o__Agaricales;f__Chromocyphellaceae;g__Chromocyphella;s__Chromocyphella_muscicola	Chromocyphella	13	Saprotroph	Undefined Saprotroph	NULL	NULL	Probable	NULL	b'Tedersoo L, et al. 2014. Science 346:1256688'
ISV_1677	k__Fungi;p__Basidiomycota;c__Agaricomycetes;o__Hymenochaetales;f__Schizoporaceae;g__Hyphodontia;s__Hyphodontia_sp	Hyphodontia	13	Saprotroph	Undefined Saprotroph	Corticioid	White Rot	Probable	NULL	b'Tedersoo L, et al. 2014. Science 346:1256688'
ISV_1679	k__Fungi;p__Basidiomycota;c__Agaricomycetes;o__Polyporales;f__Fomitopsidaceae;g__Fibroporia;s__unclassified_Fibroporia	Fibroporia	13	Saprotroph	Wood Saprotroph	Corticioid	Brown Rot	Probable	NULL	b'Tedersoo L, et al. 2014. Science 346:1256688'
ISV_168	k__Fungi;p__Ascomycota;c__Archaeorhizomycetes;o__Archaeorhizomycetales;f__Archaeorhizomycetaceae;g__Archaeorhizomyces;s__Archaeorhizomyces_sp	Archaeorhizomyces	13	Saprotroph	Soil Saprotroph	Microfungus	NULL	Probable	From rhizosphere soil and coniferous ectomycorrhizal root tips (Rosling et al. 2011)	b'Rosling A, et al. 2011. Science 333:876-879'
ISV_1683	k__Fungi;p__Basidiomycota;c__Agaricomycetes;o__Russulales;f__Russulaceae;g__Lactarius;s__unclassified_Lactarius	Lactarius	13	Symbiotroph	Ectomycorrhizal	Agaricoid	NULL	Highly Probable	Common name - milk-cap	b'Rinaldi AC, et al. 2008. Fungal Diversity 33:1-45; Tedersoo L, et al. 2010. Mycorrhiza 20:217-263; http://mycorrhizas.info/ecmf.html'
ISV_1689	k__Fungi;p__Mortierellomycota;c__Mortierellomycetes;o__Mortierellales;f__Mortierellaceae;g__Mortierella;s__unclassified_Mortierella	Mortierellaceae	9	Saprotroph-Symbiotroph	Endophyte-Litter Saprotroph-Soil Saprotroph-Undefined Saprotroph	Microfungus	NULL	Possible	Saprobic in soil and thus frequenctly isolated from soil and material contaminated with soil such as hay or rotten silage and spoil tips (Cannon & Kirk 2007)	b'Cannon PF, Kirk PM. 2007. Fungal Families of the World. CAB International, Cambridge; Purahong W, et al. 2016. Molecular Ecology 25:4059-4074'
ISV_1699	k__Fungi;p__Basidiomycota;c__Agaricomycetes;o__Polyporales;f__Podoscyphaceae;g__Hypochnicium;s__Hypochnicium_sp	Hypochnicium	13	Saprotroph	Undefined Saprotroph	Corticioid	White Rot	Probable	NULL	b'Tedersoo L, et al. 2014. Science 346:1256688'
ISV_1700	k__Fungi;p__Ascomycota;c__Dothideomycetes;o__Pleosporales;f__Didymosphaeriaceae;g__Paraphaeosphaeria;s__Paraphaeosphaeria_sp	Paraphaeosphaeria	13	Saprotroph	Undefined Saprotroph	NULL	NULL	Probable	NULL	b'Tedersoo L, et al. 2014. Science 346:1256688'
ISV_1721	k__Fungi;p__Ascomycota;c__Sordariomycetes;o__Hypocreales;f__Stachybotryaceae;g__Myxospora;s__Myxospora_sp	Hypocreales	7	Saprotroph	Undefined Saprotroph	Microfungus	NULL	Possible	NULL	b'Sterkenburg E, et al. 2015. New Phytologist 207:1145-1158'
ISV_1732	k__Fungi;p__Ascomycota;c__Dothideomycetes;o__Capnodiales;f__Mycosphaerellaceae;g__Ramularia;s__unclassified_Ramularia	Ramularia	13	Pathotroph	Plant Pathogen	Microfungus	NULL	Probable	NULL	b'Tedersoo L, et al. 2014. Science 346:1256688'
ISV_1751	k__Fungi;p__Glomeromycota;c__unidentified_29935;o__unidentified_29765;f__unidentified_29299;g__unidentified_25828;s__Glomeromycotina	Glomeromycota	3	Symbiotroph	Arbuscular Mycorrhizal	NULL	NULL	Highly Probable	NULL	b'Redecker D, et al. 2013. Mycorrhiza 23:515-531'
ISV_1762	k__Fungi;p__Basidiomycota;c__Agaricomycetes;o__Agaricales;f__Inocybaceae;g__Inocybe;s__Inocybe_sp	Inocybaceae	9	Symbiotroph	Ectomycorrhizal	Agaricoid	NULL	Probable	Sensu stricto with the exclusion of Crepidotaceae, Tubariaceae, and Chromocyphellaceae; Pharmacology: muscarine, psilocybin, aeruginascen, unclarified alkaloids, or none	b'Matheny PB. 2009. McIlvainea 18:11-21'
ISV_1770	k__Fungi;p__Basidiomycota;c__Agaricomycetes;o__Boletales;f__Melanogastraceae;g__Melanogaster;s__Melanogaster_sp	Melanogaster	13	Symbiotroph	Ectomycorrhizal	Gasteroid	Hypogeous	Highly Probable	Common name - false truffle	b'Rinaldi AC, et al. 2008. Fungal Diversity 33:1-45; Tedersoo L, et al. 2010. Mycorrhiza 20:217-263; http://mycorrhizas.info/ecmf.html'
ISV_1773	k__Fungi;p__Basidiomycota;c__Agaricomycetes;o__Russulales;f__Russulaceae;g__Lactarius;s__unclassified_Lactarius	Lactarius	13	Symbiotroph	Ectomycorrhizal	Agaricoid	NULL	Highly Probable	Common name - milk-cap	b'Rinaldi AC, et al. 2008. Fungal Diversity 33:1-45; Tedersoo L, et al. 2010. Mycorrhiza 20:217-263; http://mycorrhizas.info/ecmf.html'
ISV_1777	k__Fungi;p__Basidiomycota;c__Agaricomycetes;o__Hymenochaetales;f__Hymenochaetaceae;g__unidentified_3373;s__Hymenochaetaceae_sp	Hymenochaetaceae	9	Saprotroph-Symbiotroph	Ectomycorrhizal-Wood Saprotroph	Corticioid-Polyporoid	NULL	Probable	Lignicolous, causing white rots, rarely ectomycorrhizal (Cannon & Kirk 2007)	b'Cannon PF, Kirk PM. 2007. Fungal Families of the World. CAB International, Cambridge'
ISV_1782	k__Fungi;p__Ascomycota;c__Dothideomycetes;o__Capnodiales;f__Mycosphaerellaceae;g__Septoria;s__Septoria_sp	Septoria	13	Pathotroph	Plant Pathogen	Microfungus	NULL	Probable	NULL	b'Tedersoo L, et al. 2014. Science 346:1256688'
ISV_1795	k__Fungi;p__Ascomycota;c__Leotiomycetes;o__Helotiales;f__Helotiaceae;g__unidentified_65;s__Helotiaceae_sp	Helotiaceae	9	Saprotroph-Symbiotroph	Ectomycorrhizal-Fungal Parasite-Plant Pathogen-Wood Saprotroph	Microfungus	NULL	Probable	Usually saprobic on herbaceous or woody tissues, some species fungicolous. A few species are known to form mycorrhizae (Cannon & Kirk 2007)	b'Cannon PF, Kirk PM. 2007. Fungal Families of the World. CAB International, Cambridge'
ISV_1797	k__Fungi;p__Basidiomycota;c__Agaricomycetes;o__Agaricales;f__Pluteaceae;g__Pluteus;s__unclassified_Pluteus	Pluteus	13	Pathotroph-Saprotroph	Bryophyte Parasite-Litter Saprotroph-Wood Saprotroph	Agaricoid	White Rot	Probable	NULL	b'Grgurinovic CA, Simpson JA. 2001. Fungal Diversity 8:97-127; James TY, et al. 2006. Nature 443:818-822; Tedersoo L, et al. 2014. Science 346:1256688'
ISV_18	k__Fungi;p__Ascomycota;c__Sordariomycetes;o__Hypocreales;f__Hypocreaceae;g__Trichoderma;s__unclassified_Trichoderma	Hypocreales	7	Saprotroph	Undefined Saprotroph	Microfungus	NULL	Possible	NULL	b'Sterkenburg E, et al. 2015. New Phytologist 207:1145-1158'
ISV_180	k__Fungi;p__Ascomycota;c__Sordariomycetes;o__Sordariales;f__Cephalothecaceae;g__Cephalotheca;s__Cephalotheca_sp	Cephalotheca	13	Saprotroph	Undefined Saprotroph	NULL	NULL	Probable	NULL	b'http://www.apsnet.org/publications/commonnames/Pages/default.aspx'
ISV_1801	k__Fungi;p__Ascomycota;c__Eurotiomycetes;o__Eurotiales;f__Aspergillaceae;g__Penicillium;s__unclassified_Penicillium	Eurotiales	7	Saprotroph	Undefined Saprotroph	Microfungus	NULL	Possible	NULL	b'Sterkenburg E, et al. 2015. New Phytologist 207:1145-1158'
ISV_1803	k__Fungi;p__Ascomycota;c__Sordariomycetes;o__Hypocreales;f__unidentified_1250;g__unidentified_1078;s__Hypocreales_sp	Hypocreales	7	Saprotroph	Undefined Saprotroph	Microfungus	NULL	Possible	NULL	b'Sterkenburg E, et al. 2015. New Phytologist 207:1145-1158'
ISV_1808	k__Fungi;p__Ascomycota;c__Dothideomycetes;o__Dothideales;f__Dothideaceae;g__Scleroconidioma;s__unclassified_Scleroconidioma	Scleroconidioma	13	Pathotroph	Plant Pathogen	NULL	NULL	Probable	NULL	b'Tedersoo L, et al. 2014. Science 346:1256688'
ISV_181	k__Fungi;p__Ascomycota;c__Leotiomycetes;o__Helotiales;f__Leotiaceae;g__Pezoloma;s__unclassified_Pezoloma	Pezoloma	13	Pathotroph-Saprotroph-Symbiotroph	Bryophyte Parasite-Ectomycorrhizal-Ericoid Mycorrhizal-Undefined Saprotroph-Wood Saprotroph	Microfungus; Dark Septate Microfungus	NULL	Possible	Syn.: Hymenoscyphus among other (see e.g., Pezoloma ericae)	b'Korf RP. 1999. Mycotaxon 73:493-497; Baral and Krieglsteiner 2006. Acta Mycologica 41:11-20 (as a bryophyte parasite); Huhtinen et al. 2010. Nova Hedwigia 90:413-431, Bent et al. 2011. Applied and Environmental Microbiology 77:3351-3359 (as ectomycorrhizae); Tedersoo L, et al. 2014. Science 346:1256688 (as saprotroph)'
ISV_1823	k__Fungi;p__Ascomycota;c__Pezizomycetes;o__Pezizales;f__Pyronemataceae;g__Genea;s__unclassified_Genea	Genea	13	Symbiotroph	Ectomycorrhizal	NULL	NULL	Highly Probable	NULL	b'Rinaldi AC, et al. 2008. Fungal Diversity 33:1-45; Tedersoo L, et al. 2010. Mycorrhiza 20:217-263; http://mycorrhizas.info/ecmf.html'
ISV_1824	k__Fungi;p__Basidiomycota;c__Agaricomycetes;o__Thelephorales;f__Thelephoraceae;g__unidentified;s__Thelephoraceae_sp	Thelephoraceae	9	Saprotroph-Symbiotroph	Ectomycorrhizal-Undefined Saprotroph	Clavarioid	NULL	Probable	On the ground, on soil, a few on wood. At least some speices ectomycorrhizal (Cannon & Kirk 2007)	b'Cannon PF, Kirk PM. 2007. Fungal Families of the World. CAB International, Cambridge'
ISV_1826	k__Fungi;p__Basidiomycota;c__Agaricomycetes;o__Agaricales;f__Crepidotaceae;g__Crepidotus;s__Crepidotus_applanatus	Crepidotaceae	9	Saprotroph	Wood Saprotroph	Agaricoid	NULL	Probable	NULL	b'Aime MC, et al. 2005. American Journal of Botany 92:74-82'
ISV_1839	k__Fungi;p__Basidiomycota;c__Agaricomycetes;o__Agaricales;f__Pleurotaceae;g__Hohenbuehelia;s__unclassified_Hohenbuehelia	Hohenbuehelia	13	Saprotroph	Undefined Saprotroph	Agaricoid	White Rot	Probable	NULL	b'Tedersoo L, et al. 2014. Science 346:1256688'
ISV_1842	k__Fungi;p__Basidiomycota;c__Agaricomycetes;o__Russulales;f__Auriscalpiaceae;g__Lentinellus;s__Lentinellus_cochleatus	Lentinellus	13	Saprotroph	Undefined Saprotroph	Agaricoid	White Rot	Probable	NULL	b'Tedersoo L, et al. 2014. Science 346:1256688'
ISV_1857	k__Fungi;p__Ascomycota;c__Leotiomycetes;o__Helotiales;f__Hyaloscyphaceae;g__unidentified_11;s__Hyaloscyphaceae_sp	Hyaloscyphaceae	9	Saprotroph	Plant Saprotroph-Wood Saprotroph	Microfungus	NULL	Probable	Saprobic on woody and herbaceous material (Cannon & Kirk 2007)	b'Cannon PF, Kirk PM. 2007. Fungal Families of the World. CAB International, Cambridge'
ISV_1859	k__Fungi;p__Basidiomycota;c__Agaricomycetes;o__Boletales;f__Boletaceae;g__Retiboletus;s__Retiboletus_flavoniger	Retiboletus	13	Symbiotroph	Ectomycorrhizal	Boletoid	NULL	Highly Probable	NULL	b'Rinaldi AC, et al. 2008. Fungal Diversity 33:1-45; Tedersoo L, et al. 2010. Mycorrhiza 20:217-263'
ISV_1866	k__Fungi;p__Ascomycota;c__Dothideomycetes;o__Pleosporales;f__Dictyosporiaceae;g__Dictyosporium;s__unclassified_Dictyosporium	Dictyosporium	13	Saprotroph	Undefined Saprotroph	Microfungus	NULL	Probable	NULL	b'Tedersoo L, et al. 2014. Science 346:1256688 (doi:10.1126/science.1256688)'
ISV_1869	k__Fungi;p__Ascomycota;c__Sordariomycetes;o__Ophiostomatales;f__Ophiostomataceae;g__Sporothrix;s__unclassified_Sporothrix	Sporothrix	13	Pathotroph-Saprotroph-Symbiotroph	Animal Pathogen-Endophyte-Plant Saprotroph-Soil Saprotroph	NULL	NULL	Probable	Endophyte detection method-culture (Dik et al. 1998); The fungal genus Sporothrix comprises a group of thermodimorphic pathogens that cause skin infections in humans and other mammals. Rose gardener’s disease (Sporotrichosis) occurs worldwide, with hyperendemic areas in Brazil, China, and South Africa (Rodrigues et al. 2016); The fungus lives throughout the world in soil and on plant matter such …	b'Dik AJ, et al. 1998. European Journal of Plant Pathology 104:413-423; Rodrigues AM, et al. 2016. PLoS Pathogens 12:e1005638; https://www.cdc.gov'
ISV_1876	k__Fungi;p__Ascomycota;c__Leotiomycetes;o__Helotiales;f__Myxotrichaceae;g__unidentified_1449;s__Myxotrichaceae_sp	Myxotrichaceae	9	Saprotroph-Symbiotroph	Ectomycorrhizal-Undefined Saprotroph	Microfungus	NULL	Probable	Many species are cellulolytic, occurring on paper, straw etc. Others are mycorrhizal associated with roots of Ericaceae and Epacridaceae (Cannon & Kirk 2007)	b'Cannon PF, Kirk PM. 2007. Fungal Families of the World. CAB International, Cambridge'
ISV_1878	k__Fungi;p__Basidiomycota;c__Agaricomycetes;o__Thelephorales;f__Thelephoraceae;g__Thelephora;s__unclassified_Thelephora	Thelephora	13	Symbiotroph	Ectomycorrhizal	Clavarioid	NULL	Highly Probable	NULL	b'Rinaldi AC, et al. 2008. Fungal Diversity 33:1-45; Tedersoo L, et al. 2010. Mycorrhiza 20:217-263; http://mycorrhizas.info/ecmf.html'
ISV_1880	k__Fungi;p__Ascomycota;c__Eurotiomycetes;o__Eurotiales;f__Elaphomycetaceae;g__Elaphomyces;s__Elaphomyces_sp	Elaphomyces	13	Symbiotroph	Ectomycorrhizal	Gasteroid	Hypogeous	Highly Probable	Common name - false truffle	b'Rinaldi AC, et al. 2008. Fungal Diversity 33:1-45; Tedersoo L, et al. 2010. Mycorrhiza 20:217-263; http://mycorrhizas.info/ecmf.html'
ISV_1886	k__Fungi;p__Basidiomycota;c__Agaricomycetes;o__Russulales;f__Peniophoraceae;g__Peniophora;s__Peniophora_sp	Peniophora	13	Pathotroph-Saprotroph	Plant Pathogen-Wood Saprotroph	Corticioid	White Rot	Probable	NULL	b'Tedersoo L, et al. 2014. Science 346:1256688'
ISV_1889	k__Fungi;p__Basidiomycota;c__Agaricomycetes;o__Agaricales;f__Strophariaceae;g__Pholiota;s__unclassified_Pholiota	Pholiota	13	Saprotroph	Undefined Saprotroph	Agaricoid	White Rot	Probable	NULL	b'Tedersoo L, et al. 2014. Science 346:1256688'
ISV_1890	k__Fungi;p__Ascomycota;c__Sordariomycetes;o__Hypocreales;f__Hypocreaceae;g__Trichoderma;s__unclassified_Trichoderma	Hypocreales	7	Saprotroph	Undefined Saprotroph	Microfungus	NULL	Possible	NULL	b'Sterkenburg E, et al. 2015. New Phytologist 207:1145-1158'
ISV_1896	k__Fungi;p__Basidiomycota;c__Agaricomycetes;o__Hymenochaetales;f__Hymenochaetaceae;g__Tropicoporus;s__Tropicoporus_tropicalis	Hymenochaetaceae	9	Saprotroph-Symbiotroph	Ectomycorrhizal-Wood Saprotroph	Corticioid-Polyporoid	NULL	Probable	Lignicolous, causing white rots, rarely ectomycorrhizal (Cannon & Kirk 2007)	b'Cannon PF, Kirk PM. 2007. Fungal Families of the World. CAB International, Cambridge'
ISV_1897	k__Fungi;p__Ascomycota;c__Sordariomycetes;o__Hypocreales;f__Bionectriaceae;g__Bionectria;s__unclassified_Bionectria	Bionectria	13	Pathotroph-Saprotroph	Fungal Parasite-Undefined Saprotroph	Microfungus	NULL	Probable	NULL	b'Tedersoo L, et al. 2014. Science 346:1256688'
ISV_1898	k__Fungi;p__Ascomycota;c__Saccharomycetes;o__Saccharomycetales;f__Saccharomycetales_fam_Incertae_sedis;g__Candida;s__unclassified_Candida	Saccharomycetales	7	Saprotroph	Undefined Saprotroph	Yeast	NULL	Possible	NULL	b'Sterkenburg E, et al. 2015. New Phytologist 207:1145-1158'
ISV_1913	k__Fungi;p__Ascomycota;c__Eurotiomycetes;o__Eurotiales;f__Aspergillaceae;g__Penicillium;s__Penicillium_sp	Eurotiales	7	Saprotroph	Undefined Saprotroph	Microfungus	NULL	Possible	NULL	b'Sterkenburg E, et al. 2015. New Phytologist 207:1145-1158'
ISV_1919	k__Fungi;p__Ascomycota;c__Sordariomycetes;o__Xylariales;f__Xylariaceae;g__Daldinia;s__unclassified_Daldinia	Daldinia	13	Saprotroph	Undefined Saprotroph	NULL	NULL	Probable	NULL	b'Tedersoo L, et al. 2014. Science 346:1256688'
ISV_192	k__Fungi;p__Glomeromycota;c__unidentified_29935;o__unidentified_29765;f__unidentified_29299;g__unidentified_25828;s__Glomeromycotina	Glomeromycota	3	Symbiotroph	Arbuscular Mycorrhizal	NULL	NULL	Highly Probable	NULL	b'Redecker D, et al. 2013. Mycorrhiza 23:515-531'
ISV_1920	k__Fungi;p__Basidiomycota;c__Agaricomycetes;o__Agaricales;f__Amanitaceae;g__Amanita;s__unclassified_Amanita	Amanita	13	Symbiotroph	Ectomycorrhizal	Agaricoid	NULL	Highly Probable	NULL	b'Rinaldi AC, et al. 2008. Fungal Diversity 33:1-45; Tedersoo L, et al. 2010. Mycorrhiza 20:217-263; http://mycorrhizas.info/ecmf.html'
ISV_1921	k__Fungi;p__Basidiomycota;c__Agaricomycetes;o__Agaricales;f__Entolomataceae;g__Entoloma;s__Entoloma_quadratum	Entoloma	13	Pathotroph-Saprotroph-Symbiotroph	Ectomycorrhizal-Fungal Parasite-Soil Saprotroph-Undefined Saprotroph	Agaricoid	NULL	Possible	NULL	b'Rinaldi AC, et al. 2008. Fungal Diversity 33:1-45 (ECM/(not ECM); Tedersoo L, et al. 2010. Mycorrhiza 20:217-263 (sensu stricto); http://mycorrhizas.info/ecmf.html (ECM/(not ECM)'
ISV_1922	k__Fungi;p__Basidiomycota;c__Agaricomycetes;o__Polyporales;f__Grifolaceae;g__Grifola;s__Grifola_frondosa	Grifola	13	Pathotroph-Saprotroph	Plant Pathogen-Wood Saprotroph	Polyporoid	White Rot	Highly Probable	NULL	b'Gilbertson RL, Ryvarden L. 1987-1987. North American Polypores. Fungiflora, Oslo'
ISV_1924	k__Fungi;p__Ascomycota;c__Sordariomycetes;o__Diaporthales;f__Diaporthaceae;g__Diaporthe;s__unclassified_Diaporthe	Diaporthe	13	Pathotroph-Symbiotroph	Endophyte-Plant Pathogen	Microfungus	NULL	Possible	NULL	b'Tedersoo L, et al. 2014. Science 346:1256688'
ISV_1926	k__Fungi;p__Ascomycota;c__Eurotiomycetes;o__Chaetothyriales;f__Herpotrichiellaceae;g__Phialophora;s__Phialophora_geniculata	Phialophora	13	Pathotroph-Saprotroph-Symbiotroph	Animal Pathogen-Endophyte-Ericoid Mycorrhizal-Plant Pathogen-Wood Saprotroph	Facultative Yeast-Microfungus	NULL	Possible	Consult the current literature for updated names on this paraphyletic grouping that included the Black Yeasts, Dark Septate Endophytes, etc.	b'Nilsson T. 1973. Studies on wood degradation and cellulolytic activity of microfungi. No. 104; de Hoog GS, et al. 2000. Mycoses 43:409-416; Rinaldi AC, et al. 2008. Fungal Diversity 33:1-45; Newsham 2011. New Phytologist 190:783-793 (as DSE); Irinyi L, et al. 2015. Medical Mycology 53:313-337; http://www.apsnet.org/publications/commonnames/Pages/default.aspx'
ISV_1928	k__Fungi;p__Basidiomycota;c__Agaricomycetes;o__Sebacinales;f__Serendipitaceae;g__Serendipita;s__Serendipita_sp	Serendipita	13	Symbiotroph	Orchid Mycorrhizal	NULL	NULL	Highly Probable	NULL	b'Tedersoo L, et al. 2010. Mycorrhiza 20:217-263 (pro parte); Weiss et al. DOI: 10.1111/nph.13977'
ISV_1931	k__Fungi;p__Ascomycota;c__Sordariomycetes;o__Sordariales;f__Lasiosphaeriaceae;g__Lasiosphaeria;s__unclassified_Lasiosphaeria	Lasiosphaeria	13	Saprotroph	Undefined Saprotroph	NULL	NULL	Probable	NULL	b'Tedersoo L, et al. 2014. Science 346:1256688'
ISV_1932	k__Fungi;p__Basidiomycota;c__Agaricomycetes;o__Agaricales;f__Agaricaceae;g__Micropsalliota;s__unclassified_Micropsalliota	Micropsalliota	13	Saprotroph	Undefined Saprotroph	NULL	NULL	Probable	NULL	b'Tedersoo L, et al. 2014. Science 346:1256688'
ISV_1934	k__Fungi;p__Basidiomycota;c__Tremellomycetes;o__Tremellales;f__Tremellales_fam_Incertae_sedis;g__Cuniculitrema;s__Cuniculitrema_polymorpha	Tremellales	7	Pathotroph-Saprotroph-Symbiotroph	Fungal Parasite-Undefined Saprotroph	Tremelloid-Yeast	NULL	Possible	The order contains both teleomorphic and anamorphic species, most of the latter being yeasts	b'Sterkenburg E, et al. 2015. New Phytologist 207:1145-1158'
ISV_1938	k__Fungi;p__Basidiomycota;c__Agaricomycetes;o__Agaricales;f__unidentified_978;g__unidentified_863;s__Agaricales_sp	Agaricales	7	Pathotroph-Saprotroph-Symbiotroph	Bryophyte Parasite-Dung Saprotroph-Ectomycorrhizal-Fungal Parasite-Leaf Saprotroph-Plant Parasite-Undefined Saprotroph-Wood Saprotroph	Agaricoid-Gasteroid-Microfungus-Secotioid-Yeast	NULL	Possible	Mushrooms and toadstools, Gill fungi, Agarics... lignicolous, sometimes muscicolous or fungicolous, saprobic, mycorrhizal, rarely parasitic on plants or fungi (Kirk et al. 2008)	b'Kirk PM et al. 2008. Dictionary of the Fungi. Tenth Edition. CAB International, Wallingford'
ISV_1939	k__Fungi;p__Basidiomycota;c__Agaricomycetes;o__Agaricales;f__Strophariaceae;g__Psilocybe;s__Psilocybe_yungensis	Psilocybe	13	Saprotroph	Undefined Saprotroph	Agaricoid	Poisonous	Probable	NULL	b'Tedersoo L, et al. 2014. Science 346:1256688'
ISV_1941	k__Fungi;p__Ascomycota;c__Pezizomycetes;o__Pezizales;f__Pyronemataceae;g__Scutellinia;s__Scutellinia_sp	Scutellinia	13	Saprotroph	Undefined Saprotroph	Pezizoid	NULL	Probable	Common name - eye lash cup	b'Tedersoo L, et al. 2014. Science 346:1256688'
ISV_1943	k__Fungi;p__Ascomycota;c__Sordariomycetes;o__Xylariales;f__Xylariaceae;g__Ascovirgaria;s__unclassified_Ascovirgaria	Ascovirgaria	13	Saprotroph	Undefined Saprotroph	NULL	NULL	Probable	NULL	b'Tedersoo L, et al. 2014. Science 346:1256688'
ISV_1950	k__Fungi;p__Ascomycota;c__Sordariomycetes;o__Xylariales;f__Xylariaceae;g__Rosellinia;s__Rosellinia_aquila	Rosellinia	13	Saprotroph	Undefined Saprotroph	NULL	NULL	Probable	NULL	b'Tedersoo L, et al. 2014. Science 346:1256688'
ISV_1951	k__Fungi;p__Basidiomycota;c__Agaricomycetes;o__Russulales;f__Russulaceae;g__Russula;s__unclassified_Russula	Russula	13	Symbiotroph	Ectomycorrhizal	Agaricoid	NULL	Highly Probable	NULL	b'Rinaldi AC, et al. 2008. Fungal Diversity 33:1-45; Tedersoo L, et al. 2010. Mycorrhiza 20:217-263; http://mycorrhizas.info/ecmf.html'
ISV_1958	k__Fungi;p__Basidiomycota;c__Tremellomycetes;o__Tremellales;f__Tremellaceae;g__Tremella;s__Tremella_sp	Tremella	13	Pathotroph	Fungal Parasite-Lichen Parasite	Facultative Yeast-Microfungus-Tremelloid	NULL	Probable	NULL	b'Tedersoo L, et al. 2014. Science 346:1256688'
ISV_1986	k__Fungi;p__Basidiomycota;c__Agaricomycetes;o__Polyporales;f__Steccherinaceae;g__Steccherinum;s__unclassified_Steccherinum	Steccherinum	13	Saprotroph	Undefined Saprotroph	Corticioid	White Rot	Probable	NULL	b'Tedersoo L, et al. 2014. Science 346:1256688'
ISV_203	k__Fungi;p__Ascomycota;c__Leotiomycetes;o__Thelebolales;f__Pseudeurotiaceae;g__Pseudeurotium;s__Pseudeurotium_sp	Pseudeurotium	13	Saprotroph	Undefined Saprotroph	NULL	NULL	Probable	NULL	b'Tedersoo L, et al. 2014. Science 346:1256688'
ISV_204	k__Fungi;p__Ascomycota;c__Eurotiomycetes;o__Chaetothyriales;f__Herpotrichiellaceae;g__unidentified_801;s__Herpotrichiellaceae_sp	Herpotrichiellaceae	9	Pathotroph-Saprotroph	Animal Pathogen-Fungal Parasite-Undefined Saprotroph	Facultative Yeast-Microfungus	NULL	Probable	Mostly saprobic on plants or other fungi, isolated from soil etc., and from medical sources (Cannon & Kirk 2007)	b'Cannon PF, Kirk PM. 2007. Fungal Families of the World. CAB International, Cambridge'
ISV_205	k__Fungi;p__Mortierellomycota;c__Mortierellomycetes;o__Mortierellales;f__Mortierellaceae;g__Mortierella;s__Mortierella_sp	Mortierellaceae	9	Saprotroph-Symbiotroph	Endophyte-Litter Saprotroph-Soil Saprotroph-Undefined Saprotroph	Microfungus	NULL	Possible	Saprobic in soil and thus frequenctly isolated from soil and material contaminated with soil such as hay or rotten silage and spoil tips (Cannon & Kirk 2007)	b'Cannon PF, Kirk PM. 2007. Fungal Families of the World. CAB International, Cambridge; Purahong W, et al. 2016. Molecular Ecology 25:4059-4074'
ISV_209	k__Fungi;p__Chytridiomycota;c__Rhizophydiomycetes;o__Rhizophydiales;f__Terramycetaceae;g__Terramyces;s__unclassified_Terramyces	Terramyces	13	Saprotroph	Undefined Saprotroph	NULL	NULL	Probable	NULL	b'Tedersoo L, et al. 2014. Science 346:1256688'
ISV_216	k__Fungi;p__Ascomycota;c__Sordariomycetes;o__Hypocreales;f__Nectriaceae;g__Neonectria;s__Neonectria_sp	Neonectria	13	Pathotroph	Plant Pathogen	NULL	NULL	Probable	NULL	b'Tedersoo L, et al. 2014. Science 346:1256688'
ISV_22	k__Fungi;p__Mortierellomycota;c__Mortierellomycetes;o__Mortierellales;f__Mortierellaceae;g__Mortierella;s__Mortierella_sp	Mortierellaceae	9	Saprotroph-Symbiotroph	Endophyte-Litter Saprotroph-Soil Saprotroph-Undefined Saprotroph	Microfungus	NULL	Possible	Saprobic in soil and thus frequenctly isolated from soil and material contaminated with soil such as hay or rotten silage and spoil tips (Cannon & Kirk 2007)	b'Cannon PF, Kirk PM. 2007. Fungal Families of the World. CAB International, Cambridge; Purahong W, et al. 2016. Molecular Ecology 25:4059-4074'
ISV_226	k__Fungi;p__Ascomycota;c__Sordariomycetes;o__Annulatascales;f__Annulatascaceae;g__Submersisphaeria;s__Submersisphaeria_sp	Submersisphaeria	13	Saprotroph	Undefined Saprotroph	NULL	NULL	Probable	NULL	b'Tedersoo L, et al. 2014. Science 346:1256688'
ISV_23	k__Fungi;p__Basidiomycota;c__Agaricomycetes;o__Russulales;f__Russulaceae;g__Russula;s__unclassified_Russula	Russula	13	Symbiotroph	Ectomycorrhizal	Agaricoid	NULL	Highly Probable	NULL	b'Rinaldi AC, et al. 2008. Fungal Diversity 33:1-45; Tedersoo L, et al. 2010. Mycorrhiza 20:217-263; http://mycorrhizas.info/ecmf.html'
ISV_231	k__Fungi;p__Ascomycota;c__Sordariomycetes;o__Hypocreales;f__Ophiocordycipitaceae;g__Tolypocladium;s__Tolypocladium_sp	Tolypocladium	13	Pathotroph-Symbiotroph	Animal Pathogen-Clavicipitaceous Endophyte-Fungal Parasite	NULL	NULL	Possible	Endophyte detection method-culture (Gazis et al. 2014)	b'Gazis R, et al. 2014. Mycologia 106:1090-105; Tedersoo L, et al. 2014. Science 346:1256688; Quant CA. 2014. IMA Fungus. 5: 121-134'
ISV_233	k__Fungi;p__Ascomycota;c__Sordariomycetes;o__Sordariales;f__Sordariales_fam_Incertae_sedis;g__Dendrosporium;s__Dendrosporium_sp	Dendrosporium	13	Saprotroph	Undefined Saprotroph	NULL	NULL	Probable	NULL	b'Tedersoo L, et al. 2014. Science 346:1256688'
ISV_236	k__Fungi;p__Basidiomycota;c__Agaricomycetes;o__Agaricales;f__Strophariaceae;g__Pholiota;s__unclassified_Pholiota	Pholiota	13	Saprotroph	Undefined Saprotroph	Agaricoid	White Rot	Probable	NULL	b'Tedersoo L, et al. 2014. Science 346:1256688'
ISV_277	k__Fungi;p__Ascomycota;c__Eurotiomycetes;o__Eurotiales;f__Aspergillaceae;g__Penicillium;s__Penicillium_sp	Eurotiales	7	Saprotroph	Undefined Saprotroph	Microfungus	NULL	Possible	NULL	b'Sterkenburg E, et al. 2015. New Phytologist 207:1145-1158'
ISV_278	k__Fungi;p__Glomeromycota;c__unidentified_29935;o__unidentified_29765;f__unidentified_29299;g__unidentified_25828;s__Glomeromycotina	Glomeromycota	3	Symbiotroph	Arbuscular Mycorrhizal	NULL	NULL	Highly Probable	NULL	b'Redecker D, et al. 2013. Mycorrhiza 23:515-531'
ISV_28	k__Fungi;p__Ascomycota;c__Sordariomycetes;o__Hypocreales;f__Hypocreaceae;g__Trichoderma;s__unclassified_Trichoderma	Hypocreales	7	Saprotroph	Undefined Saprotroph	Microfungus	NULL	Possible	NULL	b'Sterkenburg E, et al. 2015. New Phytologist 207:1145-1158'
ISV_283	k__Fungi;p__Ascomycota;c__Leotiomycetes;o__Helotiales;f__Leotiaceae;g__Pezoloma;s__Pezoloma_ericae	Pezoloma	13	Pathotroph-Saprotroph-Symbiotroph	Bryophyte Parasite-Ectomycorrhizal-Ericoid Mycorrhizal-Undefined Saprotroph-Wood Saprotroph	Microfungus; Dark Septate Microfungus	NULL	Possible	Syn.: Hymenoscyphus among other (see e.g., Pezoloma ericae)	b'Korf RP. 1999. Mycotaxon 73:493-497; Baral and Krieglsteiner 2006. Acta Mycologica 41:11-20 (as a bryophyte parasite); Huhtinen et al. 2010. Nova Hedwigia 90:413-431, Bent et al. 2011. Applied and Environmental Microbiology 77:3351-3359 (as ectomycorrhizae); Tedersoo L, et al. 2014. Science 346:1256688 (as saprotroph)'
ISV_289	k__Fungi;p__Ascomycota;c__Sordariomycetes;o__Annulatascales;f__Annulatascales_fam_Incertae_sedis;g__Cyanoannulus;s__Cyanoannulus_sp	Cyanoannulus	13	Saprotroph	Undefined Saprotroph	NULL	NULL	Probable	NULL	b'Tedersoo L, et al. 2014. Science 346:1256688'
ISV_3	k__Fungi;p__Mortierellomycota;c__Mortierellomycetes;o__Mortierellales;f__Mortierellaceae;g__Mortierella;s__unclassified_Mortierella	Mortierellaceae	9	Saprotroph-Symbiotroph	Endophyte-Litter Saprotroph-Soil Saprotroph-Undefined Saprotroph	Microfungus	NULL	Possible	Saprobic in soil and thus frequenctly isolated from soil and material contaminated with soil such as hay or rotten silage and spoil tips (Cannon & Kirk 2007)	b'Cannon PF, Kirk PM. 2007. Fungal Families of the World. CAB International, Cambridge; Purahong W, et al. 2016. Molecular Ecology 25:4059-4074'
ISV_311	k__Fungi;p__Glomeromycota;c__unidentified_29935;o__unidentified_29765;f__unidentified_29299;g__unidentified_25828;s__Glomeromycotina	Glomeromycota	3	Symbiotroph	Arbuscular Mycorrhizal	NULL	NULL	Highly Probable	NULL	b'Redecker D, et al. 2013. Mycorrhiza 23:515-531'
ISV_312	k__Fungi;p__Mortierellomycota;c__Mortierellomycetes;o__Mortierellales;f__Mortierellaceae;g__Mortierella;s__Mortierella_sp	Mortierellaceae	9	Saprotroph-Symbiotroph	Endophyte-Litter Saprotroph-Soil Saprotroph-Undefined Saprotroph	Microfungus	NULL	Possible	Saprobic in soil and thus frequenctly isolated from soil and material contaminated with soil such as hay or rotten silage and spoil tips (Cannon & Kirk 2007)	b'Cannon PF, Kirk PM. 2007. Fungal Families of the World. CAB International, Cambridge; Purahong W, et al. 2016. Molecular Ecology 25:4059-4074'
ISV_315	k__Fungi;p__Basidiomycota;c__Agaricomycetes;o__Polyporales;f__Ganodermataceae;g__Ganoderma;s__unclassified_Ganoderma	Ganodermataceae	9	Pathotroph-Saprotroph	Plant Pathogen-Wood Saprotroph	Polyporoid	White Rot	Probable	Lignicolous, causing sometimes agressive white rots of timber (Cannon & Kirk 2007)	b'Cannon PF, Kirk PM. 2007. Fungal Families of the World. CAB International, Cambridge'
ISV_317	k__Fungi;p__Glomeromycota;c__Glomeromycetes;o__Glomerales;f__Glomeraceae;g__unidentified_1315;s__Glomeraceae_sp	Glomeraceae	9	Symbiotroph	Arbuscular Mycorrhizal	NULL	NULL	Highly Probable	NULL	b'Redecker D, et al. 2013. Mycorrhiza 23:515-531'
ISV_318	k__Fungi;p__Ascomycota;c__Eurotiomycetes;o__Chaetothyriales;f__Herpotrichiellaceae;g__Cladophialophora;s__Cladophialophora_sp	Cladophialophora	13	Saprotroph	Undefined Saprotroph	Facultative Yeast	NULL	Probable	NULL	b'James TY, et al. 2006. Nature 443:818-822'
ISV_320	k__Fungi;p__Ascomycota;c__Sordariomycetes;o__Hypocreales;f__Cordycipitaceae;g__Beauveria;s__unclassified_Beauveria	Beauveria	13	Pathotroph	Animal Pathogen	NULL	NULL	Probable	NULL	b'Tedersoo L, et al. 2014. Science 346:1256688'
ISV_330	k__Fungi;p__Ascomycota;c__Leotiomycetes;o__Helotiales;f__Helotiales_fam_Incertae_sedis;g__Lauriomyces;s__unclassified_Lauriomyces	Lauriomyces	13	Saprotroph	Undefined Saprotroph	NULL	NULL	Probable	NULL	b'Tedersoo L, et al. 2014. Science 346:1256688'
ISV_332	k__Fungi;p__Ascomycota;c__Sordariomycetes;o__Ophiostomatales;f__Ophiostomataceae;g__Sporothrix;s__unclassified_Sporothrix	Sporothrix	13	Pathotroph-Saprotroph-Symbiotroph	Animal Pathogen-Endophyte-Plant Saprotroph-Soil Saprotroph	NULL	NULL	Probable	Endophyte detection method-culture (Dik et al. 1998); The fungal genus Sporothrix comprises a group of thermodimorphic pathogens that cause skin infections in humans and other mammals. Rose gardener’s disease (Sporotrichosis) occurs worldwide, with hyperendemic areas in Brazil, China, and South Africa (Rodrigues et al. 2016); The fungus lives throughout the world in soil and on plant matter such …	b'Dik AJ, et al. 1998. European Journal of Plant Pathology 104:413-423; Rodrigues AM, et al. 2016. PLoS Pathogens 12:e1005638; https://www.cdc.gov'
ISV_341	k__Fungi;p__Ascomycota;c__Sordariomycetes;o__Hypocreales;f__Nectriaceae;g__Gliocephalotrichum;s__Gliocephalotrichum_ohiense	Gliocephalotrichum	13	Saprotroph	Undefined Saprotroph	NULL	NULL	Probable	NULL	b'Tedersoo L, et al. 2014. Science 346:1256688'
ISV_359	k__Fungi;p__Ascomycota;c__Leotiomycetes;o__Helotiales;f__Hyaloscyphaceae;g__unidentified_11;s__Hyaloscyphaceae_sp	Hyaloscyphaceae	9	Saprotroph	Plant Saprotroph-Wood Saprotroph	Microfungus	NULL	Probable	Saprobic on woody and herbaceous material (Cannon & Kirk 2007)	b'Cannon PF, Kirk PM. 2007. Fungal Families of the World. CAB International, Cambridge'
ISV_363	k__Fungi;p__Ascomycota;c__Sordariomycetes;o__Xylariales;f__Xylariales_fam_Incertae_sedis;g__Fusidium;s__Fusidium_griseum	Fusidium	13	Saprotroph	Undefined Saprotroph	NULL	NULL	Probable	NULL	b'Tedersoo L, et al. 2014. Science 346:1256688'
ISV_365	k__Fungi;p__Ascomycota;c__Dothideomycetes;o__Pleosporales;f__Corynesporascaceae;g__Corynespora;s__Corynespora_smithii	Corynespora	13	Saprotroph	Undefined Saprotroph	NULL	NULL	Probable	NULL	b'Tedersoo L, et al. 2014. Science 346:1256688'
ISV_367	k__Fungi;p__Mortierellomycota;c__Mortierellomycetes;o__Mortierellales;f__Mortierellaceae;g__Mortierella;s__Mortierella_sp	Mortierellaceae	9	Saprotroph-Symbiotroph	Endophyte-Litter Saprotroph-Soil Saprotroph-Undefined Saprotroph	Microfungus	NULL	Possible	Saprobic in soil and thus frequenctly isolated from soil and material contaminated with soil such as hay or rotten silage and spoil tips (Cannon & Kirk 2007)	b'Cannon PF, Kirk PM. 2007. Fungal Families of the World. CAB International, Cambridge; Purahong W, et al. 2016. Molecular Ecology 25:4059-4074'
ISV_381	k__Fungi;p__Ascomycota;c__Leotiomycetes;o__Helotiales;f__Helotiales_fam_Incertae_sedis;g__Coleophoma;s__Coleophoma_sp	Coleophoma	13	Saprotroph	Undefined Saprotroph	NULL	NULL	Probable	NULL	b'Tedersoo L, et al. 2014. Science 346:1256688'
ISV_383	k__Fungi;p__Ascomycota;c__Sordariomycetes;o__Hypocreales;f__Nectriaceae;g__unidentified_806;s__Nectriaceae_sp	Hypocreales	7	Saprotroph	Undefined Saprotroph	Microfungus	NULL	Possible	NULL	b'Sterkenburg E, et al. 2015. New Phytologist 207:1145-1158'
ISV_386	k__Fungi;p__Ascomycota;c__Leotiomycetes;o__Helotiales;f__Helotiales_fam_Incertae_sedis;g__Leptodontidium;s__unclassified_Leptodontidium	Leptodontidium	13	Symbiotroph	Endophyte	NULL	NULL	Highly Probable	Dark Septate Endophyte, known from plant roots.	b'Jumpponen A, Trappe J. 1998. New Phytologist 140:295-310 (as DSE); Taylor DL, et al. 2014. Ecological Monographs 84:3-20.'
ISV_392	k__Fungi;p__Basidiomycota;c__Agaricomycetes;o__Russulales;f__Russulaceae;g__Russula;s__unclassified_Russula	Russula	13	Symbiotroph	Ectomycorrhizal	Agaricoid	NULL	Highly Probable	NULL	b'Rinaldi AC, et al. 2008. Fungal Diversity 33:1-45; Tedersoo L, et al. 2010. Mycorrhiza 20:217-263; http://mycorrhizas.info/ecmf.html'
ISV_394	k__Fungi;p__Ascomycota;c__Sordariomycetes;o__Glomerellales;f__Plectosphaerellaceae;g__Plectosphaerella;s__unclassified_Plectosphaerella	Plectosphaerella	13	Pathotroph	Plant Pathogen	NULL	NULL	Probable	NULL	b'Tedersoo L, et al. 2014. Science 346:1256688'
ISV_401	k__Fungi;p__Ascomycota;c__Sordariomycetes;o__Sordariales;f__Sordariales_fam_Incertae_sedis;g__Dendrosporium;s__Dendrosporium_sp	Dendrosporium	13	Saprotroph	Undefined Saprotroph	NULL	NULL	Probable	NULL	b'Tedersoo L, et al. 2014. Science 346:1256688'
ISV_41	k__Fungi;p__Basidiomycota;c__Agaricomycetes;o__Cantharellales;f__Clavulinaceae;g__Clavulina;s__unclassified_Clavulina	Clavulina	13	Symbiotroph	Ectomycorrhizal	Clavarioid	NULL	Highly Probable	NULL	b'Tedersoo L, et al. 2014. Science 346:1256688 (doi:10.1126/science.1256688)'
ISV_416	k__Fungi;p__Ascomycota;c__Leotiomycetes;o__Helotiales;f__Helotiaceae;g__Geniculospora;s__Geniculospora_grandis	Helotiaceae	9	Saprotroph-Symbiotroph	Ectomycorrhizal-Fungal Parasite-Plant Pathogen-Wood Saprotroph	Microfungus	NULL	Probable	Usually saprobic on herbaceous or woody tissues, some species fungicolous. A few species are known to form mycorrhizae (Cannon & Kirk 2007)	b'Cannon PF, Kirk PM. 2007. Fungal Families of the World. CAB International, Cambridge'
ISV_427	k__Fungi;p__Ascomycota;c__Sordariomycetes;o__Glomerellales;f__Plectosphaerellaceae;g__Plectosphaerella;s__unclassified_Plectosphaerella	Plectosphaerella	13	Pathotroph	Plant Pathogen	NULL	NULL	Probable	NULL	b'Tedersoo L, et al. 2014. Science 346:1256688'
ISV_431	k__Fungi;p__Basidiomycota;c__Agaricomycetes;o__Agaricales;f__Entolomataceae;g__Entoloma;s__unclassified_Entoloma	Entoloma	13	Pathotroph-Saprotroph-Symbiotroph	Ectomycorrhizal-Fungal Parasite-Soil Saprotroph-Undefined Saprotroph	Agaricoid	NULL	Possible	NULL	b'Rinaldi AC, et al. 2008. Fungal Diversity 33:1-45 (ECM/(not ECM); Tedersoo L, et al. 2010. Mycorrhiza 20:217-263 (sensu stricto); http://mycorrhizas.info/ecmf.html (ECM/(not ECM)'
ISV_451	k__Fungi;p__Ascomycota;c__Eurotiomycetes;o__Eurotiales;f__Aspergillaceae;g__Aspergillus;s__unclassified_Aspergillus	Eurotiales	7	Saprotroph	Undefined Saprotroph	Microfungus	NULL	Possible	NULL	b'Sterkenburg E, et al. 2015. New Phytologist 207:1145-1158'
ISV_453	k__Fungi;p__Ascomycota;c__Sordariomycetes;o__Xylariales;f__Sporocadaceae;g__Pestalotiopsis;s__unclassified_Pestalotiopsis	Pestalotiopsis	13	Pathotroph	Plant Pathogen	NULL	NULL	Probable	NULL	b'Tedersoo L, et al. 2014. Science 346:1256688'
ISV_458	k__Fungi;p__Ascomycota;c__Sordariomycetes;o__Pleurotheciales;f__Pleurotheciaceae;g__Pleurothecium;s__Pleurothecium_recurvatum	Pleurothecium	13	Saprotroph	Undefined Saprotroph	NULL	NULL	Probable	NULL	b'Tedersoo L, et al. 2014. Science 346:1256688'
ISV_486	k__Fungi;p__Ascomycota;c__Sordariomycetes;o__Hypocreales;f__Ophiocordycipitaceae;g__Tolypocladium;s__unclassified_Tolypocladium	Tolypocladium	13	Pathotroph-Symbiotroph	Animal Pathogen-Clavicipitaceous Endophyte-Fungal Parasite	NULL	NULL	Possible	Endophyte detection method-culture (Gazis et al. 2014)	b'Gazis R, et al. 2014. Mycologia 106:1090-105; Tedersoo L, et al. 2014. Science 346:1256688; Quant CA. 2014. IMA Fungus. 5: 121-134'
ISV_489	k__Fungi;p__Ascomycota;c__Sordariomycetes;o__Hypocreales;f__Bionectriaceae;g__Clonostachys;s__unclassified_Clonostachys	Clonostachys	13	Pathotroph	Plant Pathogen	NULL	NULL	Probable	NULL	b'Tedersoo L, et al. 2014. Science 346:1256688'
ISV_50	k__Fungi;p__Basidiomycota;c__Agaricomycetes;o__Trechisporales;f__Trechisporales_fam_Incertae_sedis;g__Sistotremastrum;s__Sistotremastrum_sp	Sistotremastrum	13	Saprotroph	Undefined Saprotroph	NULL	White Rot	Probable	NULL	b'Tedersoo L, et al. 2014. Science 346:1256688'
ISV_511	k__Fungi;p__Glomeromycota;c__unidentified_29935;o__unidentified_29765;f__unidentified_29299;g__unidentified_25828;s__Glomeromycotina	Glomeromycota	3	Symbiotroph	Arbuscular Mycorrhizal	NULL	NULL	Highly Probable	NULL	b'Redecker D, et al. 2013. Mycorrhiza 23:515-531'
ISV_523	k__Fungi;p__Ascomycota;c__Leotiomycetes;o__Helotiales;f__Helotiales_fam_Incertae_sedis;g__Cadophora;s__unclassified_Cadophora	Cadophora	13	Symbiotroph	Endophyte	Microfungus	NULL	Highly Probable	Dark Septate Endophyte, known from plant roots.	b'Tedersoo L, et al. 2010. Mycorrhiza 20:217-263; Newsham 2011. New Phytologist 190:783-793 (as DSE)'
ISV_531	k__Fungi;p__Ascomycota;c__Leotiomycetes;o__Helotiales;f__Helotiaceae;g__Ascocoryne;s__Ascocoryne_sp	Ascocoryne	13	Saprotroph	Undefined Saprotroph	Tremelloid-Microfungus	NULL	Probable	NULL	b'Tedersoo L, et al. 2014. Science 346:1256688'
ISV_546	k__Fungi;p__Ascomycota;c__Sordariomycetes;o__Hypocreales;f__Ophiocordycipitaceae;g__Tolypocladium;s__Tolypocladium_sp	Tolypocladium	13	Pathotroph-Symbiotroph	Animal Pathogen-Clavicipitaceous Endophyte-Fungal Parasite	NULL	NULL	Possible	Endophyte detection method-culture (Gazis et al. 2014)	b'Gazis R, et al. 2014. Mycologia 106:1090-105; Tedersoo L, et al. 2014. Science 346:1256688; Quant CA. 2014. IMA Fungus. 5: 121-134'
ISV_554	k__Fungi;p__Ascomycota;c__Archaeorhizomycetes;o__Archaeorhizomycetales;f__Archaeorhizomycetaceae;g__Archaeorhizomyces;s__Archaeorhizomyces_sp	Archaeorhizomyces	13	Saprotroph	Soil Saprotroph	Microfungus	NULL	Probable	From rhizosphere soil and coniferous ectomycorrhizal root tips (Rosling et al. 2011)	b'Rosling A, et al. 2011. Science 333:876-879'
ISV_570	k__Fungi;p__Ascomycota;c__Sordariomycetes;o__Hypocreales;f__Clavicipitaceae;g__unidentified_1077;s__Clavicipitaceae_sp	Hypocreales	7	Saprotroph	Undefined Saprotroph	Microfungus	NULL	Possible	NULL	b'Sterkenburg E, et al. 2015. New Phytologist 207:1145-1158'
ISV_571	k__Fungi;p__Basidiomycota;c__Agaricomycetes;o__Agaricales;f__Physalacriaceae;g__Oudemansiella;s__Oudemansiella_canarii	Oudemansiella	13	Saprotroph	Undefined Saprotroph	Agaricoid	NULL	Probable	NULL	b'Tedersoo L, et al. 2014. Science 346:1256688'
ISV_592	k__Fungi;p__Basidiomycota;c__Agaricomycetes;o__Agaricales;f__Hydnangiaceae;g__Laccaria;s__unclassified_Laccaria	Laccaria	13	Symbiotroph	Ectomycorrhizal	Agaricoid	NULL	Highly Probable	NULL	b'Rinaldi AC, et al. 2008. Fungal Diversity 33:1-45; Tedersoo L, et al. 2010. Mycorrhiza 20:217-263; http://mycorrhizas.info/ecmf.html'
ISV_599	k__Fungi;p__Ascomycota;c__Eurotiomycetes;o__Chaetothyriales;f__Herpotrichiellaceae;g__unidentified_801;s__Herpotrichiellaceae_sp	Herpotrichiellaceae	9	Pathotroph-Saprotroph	Animal Pathogen-Fungal Parasite-Undefined Saprotroph	Facultative Yeast-Microfungus	NULL	Probable	Mostly saprobic on plants or other fungi, isolated from soil etc., and from medical sources (Cannon & Kirk 2007)	b'Cannon PF, Kirk PM. 2007. Fungal Families of the World. CAB International, Cambridge'
ISV_60	k__Fungi;p__Basidiomycota;c__Agaricomycetes;o__Agaricales;f__unidentified_978;g__unidentified_863;s__Agaricales_sp	Agaricales	7	Pathotroph-Saprotroph-Symbiotroph	Bryophyte Parasite-Dung Saprotroph-Ectomycorrhizal-Fungal Parasite-Leaf Saprotroph-Plant Parasite-Undefined Saprotroph-Wood Saprotroph	Agaricoid-Gasteroid-Microfungus-Secotioid-Yeast	NULL	Possible	Mushrooms and toadstools, Gill fungi, Agarics... lignicolous, sometimes muscicolous or fungicolous, saprobic, mycorrhizal, rarely parasitic on plants or fungi (Kirk et al. 2008)	b'Kirk PM et al. 2008. Dictionary of the Fungi. Tenth Edition. CAB International, Wallingford'
ISV_612	k__Fungi;p__Mortierellomycota;c__Mortierellomycetes;o__Mortierellales;f__Mortierellaceae;g__Mortierella;s__unclassified_Mortierella	Mortierellaceae	9	Saprotroph-Symbiotroph	Endophyte-Litter Saprotroph-Soil Saprotroph-Undefined Saprotroph	Microfungus	NULL	Possible	Saprobic in soil and thus frequenctly isolated from soil and material contaminated with soil such as hay or rotten silage and spoil tips (Cannon & Kirk 2007)	b'Cannon PF, Kirk PM. 2007. Fungal Families of the World. CAB International, Cambridge; Purahong W, et al. 2016. Molecular Ecology 25:4059-4074'
ISV_614	k__Fungi;p__Ascomycota;c__Sordariomycetes;o__Xylariales;f__Xylariaceae;g__unidentified_860;s__Xylariaceae_sp	Xylariaceae	9	Pathotroph-Saprotroph-Symbiotroph	Dung Saprotroph-Endophyte-Plant Pathogen-Undefined Saprotroph	Xylarioid	NULL	Probable	Saprobes or weak pathogens, many endophytes, mainly in wood and bark, occasionally in soil and dung (Cannon & Kirk 2007)	b'Cannon PF, Kirk PM. 2007. Fungal Families of the World. CAB International, Cambridge'
ISV_616	k__Fungi;p__Ascomycota;c__Dothideomycetes;o__Pleosporales;f__Melanommataceae;g__Byssosphaeria;s__unclassified_Byssosphaeria	Melanommataceae	9	Saprotroph	Wood Saprotroph	Microfungus	NULL	Probable	Saprobic on wood and bark (Cannon & Kirk 2007)	b'Cannon PF, Kirk PM. 2007. Fungal Families of the World. CAB International, Cambridge'
ISV_62	k__Fungi;p__Ascomycota;c__Sordariomycetes;o__Hypocreales;f__Hypocreaceae;g__Trichoderma;s__unclassified_Trichoderma	Hypocreales	7	Saprotroph	Undefined Saprotroph	Microfungus	NULL	Possible	NULL	b'Sterkenburg E, et al. 2015. New Phytologist 207:1145-1158'
ISV_63	k__Fungi;p__Basidiomycota;c__Agaricomycetes;o__Russulales;f__Russulaceae;g__Russula;s__unclassified_Russula	Russula	13	Symbiotroph	Ectomycorrhizal	Agaricoid	NULL	Highly Probable	NULL	b'Rinaldi AC, et al. 2008. Fungal Diversity 33:1-45; Tedersoo L, et al. 2010. Mycorrhiza 20:217-263; http://mycorrhizas.info/ecmf.html'
ISV_630	k__Fungi;p__Basidiomycota;c__Agaricomycetes;o__Polyporales;f__Meruliaceae;g__Ceriporia;s__unclassified_Ceriporia	Ceriporia	13	Saprotroph	Wood Saprotroph	Corticioid	White Rot	Highly Probable	NULL	b'Tedersoo L, et al. 2014. Science 346:1256688'
ISV_636	k__Fungi;p__Ascomycota;c__Sordariomycetes;o__Hypocreales;f__Nectriaceae;g__Mariannaea;s__unclassified_Mariannaea	Mariannaea	13	Saprotroph	Undefined Saprotroph	NULL	NULL	Probable	NULL	b'Tedersoo L, et al. 2014. Science 346:1256688'
ISV_642	k__Fungi;p__Ascomycota;c__Leotiomycetes;o__Helotiales;f__Dermateaceae;g__Mollisia;s__Mollisia_sp	Mollisia	13	Pathotroph-Symbiotroph	Endophyte-Plant Pathogen	Microfungus	NULL	Probable	Dark Septate Endophyte, known from plant roots.	b'James TY, et al. 2006. Nature 443:818-822; Tedersoo L, et al. 2014. Science 346:1256688 (Plant Pathogen); Taylor DL, et al. 2014. Ecological Monographs 84:3-20 (as DSE)'
ISV_644	k__Fungi;p__Ascomycota;c__Sordariomycetes;o__Hypocreales;f__Nectriaceae;g__Fusarium;s__unclassified_Fusarium	Fusarium	13	Pathotroph-Saprotroph-Symbiotroph	Animal Pathogen-Endophyte-Lichen Parasite-Plant Pathogen-Soil Saprotroph-Wood Saprotroph	Microfungus	NULL	Possible	Likely opportunistic human pathogen (Irinyi et al. 2015)	b'Duncan CG, Eslyn WE. 1966. Mycologia 58:642-664; Seehann G, et al. 1975. List of Fungi in Soft-Rot Tissue Tests. Institute fur Holzbiologie und Holzschutz, Bundesforschungsanstalt fur Forst - und Holzwirtshaft, Hamburg - Lohbrugge, Germany; Costa IPMW, et al. 2012. Mycotaxon 119:26; Tedersoo L, et al. 2014. Science 346:1256688; Irinyi L, et al. 2015. Medical Mycology 53:313-337; Schroers et al.…
ISV_652	k__Fungi;p__Basidiomycota;c__Agaricomycetes;o__Thelephorales;f__Thelephoraceae;g__Tomentella;s__Tomentella_sp	Tomentella	13	Symbiotroph	Ectomycorrhizal	Corticioid	NULL	Highly Probable	NULL	b'Rinaldi AC, et al. 2008. Fungal Diversity 33:1-45; Tedersoo L, et al. 2010. Mycorrhiza 20:217-263; http://mycorrhizas.info/ecmf.html'
ISV_666	k__Fungi;p__Mortierellomycota;c__Mortierellomycetes;o__Mortierellales;f__Mortierellaceae;g__Mortierella;s__Mortierella_sp	Mortierellaceae	9	Saprotroph-Symbiotroph	Endophyte-Litter Saprotroph-Soil Saprotroph-Undefined Saprotroph	Microfungus	NULL	Possible	Saprobic in soil and thus frequenctly isolated from soil and material contaminated with soil such as hay or rotten silage and spoil tips (Cannon & Kirk 2007)	b'Cannon PF, Kirk PM. 2007. Fungal Families of the World. CAB International, Cambridge; Purahong W, et al. 2016. Molecular Ecology 25:4059-4074'
ISV_670	k__Fungi;p__Ascomycota;c__Saccharomycetes;o__Saccharomycetales;f__unidentified_1277;g__unidentified_1102;s__Saccharomycetales_sp	Saccharomycetales	7	Saprotroph	Undefined Saprotroph	Yeast	NULL	Possible	NULL	b'Sterkenburg E, et al. 2015. New Phytologist 207:1145-1158'
ISV_675	k__Fungi;p__Basidiomycota;c__Agaricomycetes;o__Agaricales;f__Tricholomataceae;g__Megacollybia;s__Megacollybia_sp	Megacollybia	13	Saprotroph	Undefined Saprotroph	Agaricoid	NULL	Probable	NULL	b'Tedersoo L, et al. 2014. Science 346:1256688'
ISV_688	k__Fungi;p__Ascomycota;c__Archaeorhizomycetes;o__Archaeorhizomycetales;f__Archaeorhizomycetaceae;g__Archaeorhizomyces;s__Archaeorhizomyces_sp	Archaeorhizomyces	13	Saprotroph	Soil Saprotroph	Microfungus	NULL	Probable	From rhizosphere soil and coniferous ectomycorrhizal root tips (Rosling et al. 2011)	b'Rosling A, et al. 2011. Science 333:876-879'
ISV_693	k__Fungi;p__Mortierellomycota;c__Mortierellomycetes;o__Mortierellales;f__Mortierellaceae;g__Mortierella;s__Mortierella_sp	Mortierellaceae	9	Saprotroph-Symbiotroph	Endophyte-Litter Saprotroph-Soil Saprotroph-Undefined Saprotroph	Microfungus	NULL	Possible	Saprobic in soil and thus frequenctly isolated from soil and material contaminated with soil such as hay or rotten silage and spoil tips (Cannon & Kirk 2007)	b'Cannon PF, Kirk PM. 2007. Fungal Families of the World. CAB International, Cambridge; Purahong W, et al. 2016. Molecular Ecology 25:4059-4074'
ISV_701	k__Fungi;p__Ascomycota;c__Sordariomycetes;o__Xylariales;f__Sporocadaceae;g__Pestalotiopsis;s__unclassified_Pestalotiopsis	Pestalotiopsis	13	Pathotroph	Plant Pathogen	NULL	NULL	Probable	NULL	b'Tedersoo L, et al. 2014. Science 346:1256688'
ISV_704	k__Fungi;p__Ascomycota;c__Lecanoromycetes;o__Pertusariales;f__Megasporaceae;g__Aspicilia;s__Aspicilia_sp	Aspicilia	13	Symbiotroph	Lichenized	Thallus	NULL	Highly Probable	NULL	b'Esslinger TL. 2014. North Dakota State University (http://www.ndsu.edu/pubweb/~esslinge/chcklst/chcklst7.htm)'
ISV_708	k__Fungi;p__Basidiomycota;c__Agaricomycetes;o__Agaricales;f__Strophariaceae;g__Deconica;s__unclassified_Deconica	Deconica	13	Saprotroph	Undefined Saprotroph	NULL	NULL	Probable	NULL	b'Tedersoo L, et al. 2014. Science 346:1256688'
ISV_715	k__Fungi;p__Basidiomycota;c__Agaricomycetes;o__Polyporales;f__Xenasmataceae;g__Xenasmatella;s__Xenasmatella_sp	Xenasmatella	13	Saprotroph	Undefined Saprotroph	NULL	White Rot	Probable	NULL	b'Tedersoo L, et al. 2014. Science 346:1256688 (doi:10.1126/science.1256688)'
ISV_72	k__Fungi;p__Basidiomycota;c__Tremellomycetes;o__Trichosporonales;f__Trichosporonaceae;g__Apiotrichum;s__Apiotrichum_sp	Apiotrichum	13	Saprotroph	Soil Saprotroph	Microfungus	NULL	Possible	From forest soil (Calduch et al. 2002)	b'Calduch M, et al. 2002. Mycologia 94:355-361'
ISV_721	k__Fungi;p__Basidiomycota;c__Agaricomycetes;o__Agaricales;f__Entolomataceae;g__Entoloma;s__unclassified_Entoloma	Entoloma	13	Pathotroph-Saprotroph-Symbiotroph	Ectomycorrhizal-Fungal Parasite-Soil Saprotroph-Undefined Saprotroph	Agaricoid	NULL	Possible	NULL	b'Rinaldi AC, et al. 2008. Fungal Diversity 33:1-45 (ECM/(not ECM); Tedersoo L, et al. 2010. Mycorrhiza 20:217-263 (sensu stricto); http://mycorrhizas.info/ecmf.html (ECM/(not ECM)'
ISV_724	k__Fungi;p__Ascomycota;c__Sordariomycetes;o__Hypocreales;f__Nectriaceae;g__Viridispora;s__Viridispora_alata	Hypocreales	7	Saprotroph	Undefined Saprotroph	Microfungus	NULL	Possible	NULL	b'Sterkenburg E, et al. 2015. New Phytologist 207:1145-1158'
ISV_725	k__Fungi;p__Basidiomycota;c__Agaricomycetes;o__Polyporales;f__Ganodermataceae;g__Ganoderma;s__unclassified_Ganoderma	Ganodermataceae	9	Pathotroph-Saprotroph	Plant Pathogen-Wood Saprotroph	Polyporoid	White Rot	Probable	Lignicolous, causing sometimes agressive white rots of timber (Cannon & Kirk 2007)	b'Cannon PF, Kirk PM. 2007. Fungal Families of the World. CAB International, Cambridge'
ISV_728	k__Fungi;p__Ascomycota;c__Eurotiomycetes;o__Chaetothyriales;f__Herpotrichiellaceae;g__Exophiala;s__unclassified_Exophiala	Exophiala	13	Pathotroph-Saprotroph	Animal Pathogen-Undefined Saprotroph	Facultative Yeast	NULL	Probable	NULL	b'Tedersoo L, et al. 2014. Science 346:1256688, Nagy GL, et al. 2014. Nature Communications 5:4471'
ISV_736	k__Fungi;p__Glomeromycota;c__Glomeromycetes;o__Glomerales;f__Glomeraceae;g__unidentified_1315;s__Glomeraceae_sp	Glomeraceae	9	Symbiotroph	Arbuscular Mycorrhizal	NULL	NULL	Highly Probable	NULL	b'Redecker D, et al. 2013. Mycorrhiza 23:515-531'
ISV_742	k__Fungi;p__Ascomycota;c__Sordariomycetes;o__Xylariales;f__Sporocadaceae;g__Pestalotiopsis;s__unclassified_Pestalotiopsis	Pestalotiopsis	13	Pathotroph	Plant Pathogen	NULL	NULL	Probable	NULL	b'Tedersoo L, et al. 2014. Science 346:1256688'
ISV_754	k__Fungi;p__Basidiomycota;c__Agaricomycetes;o__Corticiales;f__Corticiaceae;g__unidentified_1217;s__Corticiaceae_sp	Corticiaceae	9	Pathotroph-Saprotroph	Lichen Parasite-Plant Pathogen-Wood Saprotroph	Corticioid-Microfungus	NULL	Possible	Saprobes or pathogens on a wide range of mainly woody substrata; a few species are lichenicolous and some are grass pathogens (Cannon & Kirk 2007)	b'Cannon PF, Kirk PM. 2007. Fungal Families of the World. CAB International, Cambridge'
ISV_759	k__Fungi;p__Basidiomycota;c__Agaricomycetes;o__Agaricales;f__Lycoperdaceae;g__Lycoperdon;s__Lycoperdon_subincarnatum	Lycoperdon	13	Saprotroph	Undefined Saprotroph	Gasteroid	NULL	Probable	Common name - puffball	b'Grgurinovic CA, Simpson JA. 2001. Fungal Diversity 8:97-127; Tedersoo L, et al. 2014. Science 346:1256688'
ISV_762	k__Fungi;p__Basidiomycota;c__Agaricomycetes;o__Thelephorales;f__Thelephoraceae;g__Tomentella;s__Tomentella_sp	Tomentella	13	Symbiotroph	Ectomycorrhizal	Corticioid	NULL	Highly Probable	NULL	b'Rinaldi AC, et al. 2008. Fungal Diversity 33:1-45; Tedersoo L, et al. 2010. Mycorrhiza 20:217-263; http://mycorrhizas.info/ecmf.html'
ISV_770	k__Fungi;p__Basidiobolomycota;c__Basidiobolomycetes;o__Basidiobolales;f__Basidiobolaceae;g__Basidiobolus;s__Basidiobolus_ranarum	Basidiobolaceae	9	Pathotroph-Saprotroph-Symbiotroph	Animal Endosymbiont-Animal Pathogen-Undefined Saprotroph	Microfungus	NULL	Probable	Basidiobolus ranarum is commonly present in decaying fruit and vegetable matter, and as a commensal in the intestinal tract of frogs, toads, and lizards - Cause of subcutaneous zygomycosis in humans (Cannon & Kirk 2007)	b'Cannon PF, Kirk PM. 2007. Fungal Families of the World. CAB International, Cambridge'
ISV_79	k__Fungi;p__Ascomycota;c__Sordariomycetes;o__Hypocreales;f__Ophiocordycipitaceae;g__Tolypocladium;s__unclassified_Tolypocladium	Tolypocladium	13	Pathotroph-Symbiotroph	Animal Pathogen-Clavicipitaceous Endophyte-Fungal Parasite	NULL	NULL	Possible	Endophyte detection method-culture (Gazis et al. 2014)	b'Gazis R, et al. 2014. Mycologia 106:1090-105; Tedersoo L, et al. 2014. Science 346:1256688; Quant CA. 2014. IMA Fungus. 5: 121-134'
ISV_790	k__Fungi;p__Ascomycota;c__Leotiomycetes;o__Helotiales;f__Helotiaceae;g__unidentified_65;s__Helotiaceae_sp	Helotiaceae	9	Saprotroph-Symbiotroph	Ectomycorrhizal-Fungal Parasite-Plant Pathogen-Wood Saprotroph	Microfungus	NULL	Probable	Usually saprobic on herbaceous or woody tissues, some species fungicolous. A few species are known to form mycorrhizae (Cannon & Kirk 2007)	b'Cannon PF, Kirk PM. 2007. Fungal Families of the World. CAB International, Cambridge'
ISV_794	k__Fungi;p__Basidiomycota;c__Agaricomycetes;o__Boletales;f__Boletaceae;g__Leccinum;s__unclassified_Leccinum	Leccinum	13	Symbiotroph	Ectomycorrhizal	Boletoid	NULL	Highly Probable	NULL	b'Rinaldi AC, et al. 2008. Fungal Diversity 33:1-45; Tedersoo L, et al. 2010. Mycorrhiza 20:217-263; http://mycorrhizas.info/ecmf.html'
ISV_8	k__Fungi;p__Ascomycota;c__Sordariomycetes;o__Hypocreales;f__Nectriaceae;g__Ilyonectria;s__unclassified_Ilyonectria	Hypocreales	7	Saprotroph	Undefined Saprotroph	Microfungus	NULL	Possible	NULL	b'Sterkenburg E, et al. 2015. New Phytologist 207:1145-1158'
ISV_802	k__Fungi;p__Basidiomycota;c__Agaricomycetes;o__Agaricales;f__Cystostereaceae;g__Cystidiodontia;s__Cystidiodontia_laminifera	Cystidiodontia	13	Saprotroph	Undefined Saprotroph	NULL	White Rot	Probable	NULL	b'Tedersoo L, et al. 2014. Science 346:1256688'
ISV_82	k__Fungi;p__Basidiomycota;c__Agaricomycetes;o__Russulales;f__Russulaceae;g__Russula;s__unclassified_Russula	Russula	13	Symbiotroph	Ectomycorrhizal	Agaricoid	NULL	Highly Probable	NULL	b'Rinaldi AC, et al. 2008. Fungal Diversity 33:1-45; Tedersoo L, et al. 2010. Mycorrhiza 20:217-263; http://mycorrhizas.info/ecmf.html'
ISV_849	k__Fungi;p__Ascomycota;c__Sordariomycetes;o__Xylariales;f__Xylariaceae;g__Xylaria;s__unclassified_Xylaria	Xylaria	13	Saprotroph-Symbiotroph	Endophyte-Undefined Saprotroph-Wood Saprotroph	Xylarioid	Soft Rot	Probable	NULL	b'Duncan CG, Eslyn WE. 1966. Mycologia 58:642-645; Costa IPMW, et al. 2012. Mycotaxon 119:26; http://www.apsnet.org/publications/commonnames/Pages/default.aspx'
ISV_860	k__Fungi;p__Ascomycota;c__Sordariomycetes;o__Xylariales;f__Sporocadaceae;g__Pestalotiopsis;s__Pestalotiopsis_sp	Pestalotiopsis	13	Pathotroph	Plant Pathogen	NULL	NULL	Probable	NULL	b'Tedersoo L, et al. 2014. Science 346:1256688'
ISV_868	k__Fungi;p__Ascomycota;c__Archaeorhizomycetes;o__Archaeorhizomycetales;f__Archaeorhizomycetaceae;g__Archaeorhizomyces;s__Archaeorhizomyces_sp	Archaeorhizomyces	13	Saprotroph	Soil Saprotroph	Microfungus	NULL	Probable	From rhizosphere soil and coniferous ectomycorrhizal root tips (Rosling et al. 2011)	b'Rosling A, et al. 2011. Science 333:876-879'
ISV_906	k__Fungi;p__Basidiomycota;c__Agaricomycetes;o__Russulales;f__Russulaceae;g__Russula;s__Russula_com	ta	Russula	13	Symbiotroph	Ectomycorrhizal	Agaricoid	NULL	Highly Probable	NULL	b'Rinaldi AC, et al. 2008. Fungal Diversity 33:1-45; Tedersoo L, et al. 2010. Mycorrhiza 20:217-263; http://mycorrhizas.info/ecmf.html'
ISV_910	k__Fungi;p__Ascomycota;c__Leotiomycetes;o__Helotiales;f__Hyaloscyphaceae;g__Hyaloscypha;s__Hyaloscypha_sp	Hyaloscypha	13	Saprotroph	Undefined Saprotroph	NULL	NULL	Probable	NULL	b'Tedersoo L, et al. 2014. Science 346:1256688'
ISV_914	k__Fungi;p__Basidiomycota;c__Agaricomycetes;o__Agaricales;f__Amanitaceae;g__Amanita;s__Amanita_sp	Amanita	13	Symbiotroph	Ectomycorrhizal	Agaricoid	NULL	Highly Probable	NULL	b'Rinaldi AC, et al. 2008. Fungal Diversity 33:1-45; Tedersoo L, et al. 2010. Mycorrhiza 20:217-263; http://mycorrhizas.info/ecmf.html'
ISV_920	k__Fungi;p__Ascomycota;c__Sordariomycetes;o__Sordariales;f__Chaetomiaceae;g__Zopfiella;s__Zopfiella_attenuata	Zopfiella	13	Saprotroph	Dung Saprotroph	NULL	NULL	Highly Probable	NULL	b'Bills GF, et al. 2013. Current Opinion in microbiology, 16:549-565; Tedersoo L, et al. 2014. Science 346:1256688'
ISV_925	k__Fungi;p__Basidiomycota;c__Agaricomycetes;o__Thelephorales;f__Thelephoraceae;g__unidentified;s__Thelephoraceae_sp	Thelephoraceae	9	Saprotroph-Symbiotroph	Ectomycorrhizal-Undefined Saprotroph	Clavarioid	NULL	Probable	On the ground, on soil, a few on wood. At least some speices ectomycorrhizal (Cannon & Kirk 2007)	b'Cannon PF, Kirk PM. 2007. Fungal Families of the World. CAB International, Cambridge'
ISV_926	k__Fungi;p__Ascomycota;c__Sordariomycetes;o__Hypocreales;f__Hypocreaceae;g__Hypomyces;s__Hypomyces_sp	Hypocreales	7	Saprotroph	Undefined Saprotroph	Microfungus	NULL	Possible	NULL	b'Sterkenburg E, et al. 2015. New Phytologist 207:1145-1158'
ISV_927	k__Fungi;p__Ascomycota;c__Sordariomycetes;o__Hypocreales;f__Nectriaceae;g__Xenoacremonium;s__unclassified_Xenoacremonium	Hypocreales	7	Saprotroph	Undefined Saprotroph	Microfungus	NULL	Possible	NULL	b'Sterkenburg E, et al. 2015. New Phytologist 207:1145-1158'
ISV_928	k__Fungi;p__Ascomycota;c__Eurotiomycetes;o__Chaetothyriales;f__Herpotrichiellaceae;g__unidentified_801;s__Herpotrichiellaceae_sp	Herpotrichiellaceae	9	Pathotroph-Saprotroph	Animal Pathogen-Fungal Parasite-Undefined Saprotroph	Facultative Yeast-Microfungus	NULL	Probable	Mostly saprobic on plants or other fungi, isolated from soil etc., and from medical sources (Cannon & Kirk 2007)	b'Cannon PF, Kirk PM. 2007. Fungal Families of the World. CAB International, Cambridge'
ISV_948	k__Fungi;p__Glomeromycota;c__unidentified_29935;o__unidentified_29765;f__unidentified_29299;g__unidentified_25828;s__Glomeromycotina	Glomeromycota	3	Symbiotroph	Arbuscular Mycorrhizal	NULL	NULL	Highly Probable	NULL	b'Redecker D, et al. 2013. Mycorrhiza 23:515-531'
ISV_958	k__Fungi;p__Ascomycota;c__Leotiomycetes;o__Helotiales;f__Hyaloscyphaceae;g__unidentified_11;s__Hyaloscyphaceae_sp	Hyaloscyphaceae	9	Saprotroph	Plant Saprotroph-Wood Saprotroph	Microfungus	NULL	Probable	Saprobic on woody and herbaceous material (Cannon & Kirk 2007)	b'Cannon PF, Kirk PM. 2007. Fungal Families of the World. CAB International, Cambridge'
ISV_982	k__Fungi;p__Basidiomycota;c__Agaricomycetes;o__Agaricales;f__Hydnangiaceae;g__Laccaria;s__Laccaria_sp	Laccaria	13	Symbiotroph	Ectomycorrhizal	Agaricoid	NULL	Highly Probable	NULL	b'Rinaldi AC, et al. 2008. Fungal Diversity 33:1-45; Tedersoo L, et al. 2010. Mycorrhiza 20:217-263; http://mycorrhizas.info/ecmf.html'
ISV_983	k__Fungi;p__Ascomycota;c__Leotiomycetes;o__Helotiales;f__Helotiaceae;g__Hymenoscyphus;s__unclassified_Hymenoscyphus	Hymenoscyphus	13	Pathotroph-Saprotroph-Symbiotroph	Bryophyte Parasite-Ectomycorrhizal-Ericoid Mycorrhizal-Undefined Saprotroph	Microfungus; Dark Septate Microfungus	NULL	Possible	Syn.: Pezoloma among other (see e.g., Pezoloma ericae)	b'Baral and Krieglsteiner 2006. Acta Mycologica 41:11-20 (as a bryophyte parasite); Huhtinen et al. 2010. Nova Hedwigia 90:413-431, Bent et al. 2011. Applied and Environmental Microbiology 77:3351-3359 (as ectomycorrhizae); Tedersoo L, et al. 2014. Science 346:1256688 (as saprotroph)'
ISV_56	k__Fungi;p__Rozellomycota;c__Rozellomycotina_cls_Incertae_sedis;o__GS11;f__unidentified_2569;g__unidentified_2096;s__GS11_sp	-	-	-	-	-	-	-	Unassigned	-
ISV_69	k__Fungi;p__Ascomycota;c__Leotiomycetes;o__Helotiales;f__unidentified_29;g__unidentified_21;s__Helotiales_sp	-	-	-	-	-	-	-	Unassigned	-
ISV_76	k__Fungi;p__Ascomycota;c__Leotiomycetes;o__Helotiales;f__unidentified_29;g__unidentified_21;s__Helotiales_sp	-	-	-	-	-	-	-	Unassigned	-
ISV_91	k__Fungi;p__Basidiomycota;c__Microbotryomycetes;o__Leucosporidiales;f__unidentified_1961;g__unidentified_1606;s__Leucosporidiales_sp	-	-	-	-	-	-	-	Unassigned	-
ISV_117	k__Fungi;p__Basidiomycota;c__Agaricomycetes;o__Polyporales;f__unidentified_990;g__unidentified_869;s__Polyporales_sp	-	-	-	-	-	-	-	Unassigned	-
ISV_121	k__Fungi;p__Ascomycota;c__unidentified_990;o__unidentified_968;f__unidentified_914;g__unidentified_816;s__Ascomycota_sp	-	-	-	-	-	-	-	Unassigned	-
ISV_148	k__Fungi;p__Ascomycota;c__Leotiomycetes;o__Helotiales;f__unidentified_29;g__unidentified_21;s__Helotiales_sp	-	-	-	-	-	-	-	Unassigned	-
ISV_153	k__Fungi;p__Mortierellomycota;c__Mortierellomycetes;o__Mortierellales;f__unidentified_1452;g__unidentified_1202;s__Mortierellales_sp	-	-	-	-	-	-	-	Unassigned	-
ISV_161	k__Fungi;p__Basidiomycota;c__Agaricomycetes;o__Auriculariales;f__unidentified_34;g__unidentified_25;s__Auriculariales_sp	-	-	-	-	-	-	-	Unassigned	-
ISV_222	k__Fungi;p__Ascomycota;c__unidentified_990;o__unidentified_968;f__unidentified_914;g__unidentified_816;s__Ascomycota_sp	-	-	-	-	-	-	-	Unassigned	-
ISV_262	k__Fungi;p__Basidiomycota;c__Agaricomycetes;o__Trechisporales;f__Hydnodontaceae;g__unidentified_865;s__Hydnodontaceae_sp	-	-	-	-	-	-	-	Unassigned	-
ISV_282	k__Fungi;p__Ascomycota;c__Dothideomycetes;o__Dothideales;f__unidentified_3233;g__unidentified_2623;s__Dothideales_sp	-	-	-	-	-	-	-	Unassigned	-
ISV_313	k__Fungi;p__Ascomycota;c__Orbiliomycetes;o__Orbiliales;f__unidentified_889;g__unidentified_800;s__Orbiliales_sp	-	-	-	-	-	-	-	Unassigned	-
ISV_323	k__Fungi;p__Ascomycota;c__unidentified_990;o__unidentified_968;f__unidentified_914;g__unidentified_816;s__Ascomycota_sp	-	-	-	-	-	-	-	Unassigned	-
ISV_335	k__Fungi;p__Ascomycota;c__Eurotiomycetes;o__Chaetothyriales;f__unidentified_888;g__unidentified_799;s__Chaetothyriales_sp	-	-	-	-	-	-	-	Unassigned	-
ISV_349	k__Fungi;p__Rozellomycota;c__unidentified_2162;o__unidentified_2105;f__unidentified_1958;g__unidentified_1603;s__Rozellomycota_sp	-	-	-	-	-	-	-	Unassigned	-
ISV_354	k__Fungi;p__Chytridiomycota;c__unidentified_1618;o__unidentified_1577;f__unidentified_1451;g__unidentified_1201;s__Chytridiomycota_sp	-	-	-	-	-	-	-	Unassigned	-
ISV_387	k__Fungi;p__Ascomycota;c__Leotiomycetes;o__Helotiales;f__unidentified_29;g__unidentified_21;s__Helotiales_sp	-	-	-	-	-	-	-	Unassigned	-
ISV_414	k__Fungi;p__Ascomycota;c__Leotiomycetes;o__Helotiales;f__unidentified_29;g__unidentified_21;s__Helotiales_sp	-	-	-	-	-	-	-	Unassigned	-
ISV_415	k__Fungi;p__Ascomycota;c__Leotiomycetes;o__Helotiales;f__unidentified_29;g__unidentified_21;s__Helotiales_sp	-	-	-	-	-	-	-	Unassigned	-
ISV_422	k__Fungi;p__Ascomycota;c__Dothideomycetes;o__Capnodiales;f__unidentified_1326;g__unidentified_1137;s__Capnodiales_sp	-	-	-	-	-	-	-	Unassigned	-
ISV_441	k__Fungi;p__Rozellomycota;c__unidentified_2162;o__unidentified_2105;f__unidentified_1958;g__unidentified_1603;s__Rozellomycota_sp	-	-	-	-	-	-	-	Unassigned	-
ISV_462	k__Fungi;p__Ascomycota;c__Leotiomycetes;o__Helotiales;f__unidentified_29;g__unidentified_21;s__Helotiales_sp	-	-	-	-	-	-	-	Unassigned	-
ISV_464	k__Fungi;p__Ascomycota;c__unidentified_990;o__unidentified_968;f__unidentified_914;g__unidentified_816;s__Ascomycota_sp	-	-	-	-	-	-	-	Unassigned	-
ISV_477	k__Fungi;p__Ascomycota;c__unidentified_990;o__unidentified_968;f__unidentified_914;g__unidentified_816;s__Ascomycota_sp	-	-	-	-	-	-	-	Unassigned	-
ISV_490	k__Fungi;p__Ascomycota;c__Leotiomycetes;o__Helotiales;f__unidentified_29;g__unidentified_21;s__Helotiales_sp	-	-	-	-	-	-	-	Unassigned	-
ISV_508	k__Fungi;p__Ascomycota;c__Leotiomycetes;o__Helotiales;f__unidentified_29;g__unidentified_21;s__Helotiales_sp	-	-	-	-	-	-	-	Unassigned	-
ISV_530	k__Fungi;p__Ascomycota;c__unidentified_990;o__unidentified_968;f__unidentified_914;g__unidentified_816;s__Ascomycota_sp	-	-	-	-	-	-	-	Unassigned	-
ISV_532	k__Fungi;p__Basidiomycota;c__Agaricomycetes;o__Tremellodendropsidales;f__unidentified_942;g__unidentified_838;s__Tremellodendropsidales_sp	-	-	-	-	-	-	-	Unassigned	-
ISV_533	k__Fungi;p__Ascomycota;c__Dothideomycetes;o__Pleosporales;f__unidentified_940;g__unidentified_836;s__Pleosporales_sp	-	-	-	-	-	-	-	Unassigned	-
ISV_535	k__Fungi;p__Chytridiomycota;c__Chytridiomycetes;o__Chytridiales;f__unidentified_5272;g__unidentified_4271;s__Chytridiales_sp	-	-	-	-	-	-	-	Unassigned	-
ISV_543	k__Fungi;p__Ascomycota;c__unidentified_990;o__unidentified_968;f__unidentified_914;g__unidentified_816;s__Ascomycota_sp	-	-	-	-	-	-	-	Unassigned	-
ISV_552	k__Fungi;p__Ascomycota;c__Leotiomycetes;o__Helotiales;f__Leotiaceae;g__unidentified_17242;s__Leotiaceae_sp	-	-	-	-	-	-	-	Unassigned	-
ISV_582	k__Fungi;p__Ascomycota;c__Leotiomycetes;o__Helotiales;f__unidentified_29;g__unidentified_21;s__Helotiales_sp	-	-	-	-	-	-	-	Unassigned	-
ISV_594	k__Fungi;p__Ascomycota;c__unidentified_990;o__unidentified_968;f__unidentified_914;g__unidentified_816;s__Ascomycota_sp	-	-	-	-	-	-	-	Unassigned	-
ISV_606	k__Fungi;p__Rozellomycota;c__unidentified_2162;o__unidentified_2105;f__unidentified_1958;g__unidentified_1603;s__Rozellomycota_sp	-	-	-	-	-	-	-	Unassigned	-
ISV_711	k__Fungi;p__Ascomycota;c__Leotiomycetes;o__Helotiales;f__unidentified_29;g__unidentified_21;s__Helotiales_sp	-	-	-	-	-	-	-	Unassigned	-
ISV_803	k__Fungi;p__Rozellomycota;c__unidentified_2162;o__unidentified_2105;f__unidentified_1958;g__unidentified_1603;s__Rozellomycota_sp	-	-	-	-	-	-	-	Unassigned	-
ISV_805	k__Fungi;p__Ascomycota;c__unidentified_2940;o__unidentified_2874;f__unidentified_2693;g__unidentified_2185;s__Pezizomycotina	-	-	-	-	-	-	-	Unassigned	-
ISV_816	k__Fungi;p__Basidiomycota;c__Agaricomycetes;o__Auriculariales;f__unidentified_34;g__unidentified_25;s__Auriculariales_sp	-	-	-	-	-	-	-	Unassigned	-
ISV_847	k__Fungi;p__Ascomycota;c__unidentified_990;o__unidentified_968;f__unidentified_914;g__unidentified_816;s__Ascomycota_sp	-	-	-	-	-	-	-	Unassigned	-
ISV_864	k__Fungi;p__Rozellomycota;c__unidentified_2162;o__unidentified_2105;f__unidentified_1958;g__unidentified_1603;s__Rozellomycota_sp	-	-	-	-	-	-	-	Unassigned	-
ISV_869	k__Fungi;p__Basidiomycota;c__Tremellomycetes;o__Trichosporonales;f__Trichosporonaceae;g__unidentified_3479;s__Trichosporonaceae_sp	-	-	-	-	-	-	-	Unassigned	-
ISV_890	k__Fungi;p__Basidiomycota;c__unidentified_1343;o__unidentified_1307;f__unidentified_1215;g__unidentified_1048;s__Basidiomycota_sp	-	-	-	-	-	-	-	Unassigned	-
ISV_891	k__Fungi;p__Ascomycota;c__unidentified_990;o__unidentified_968;f__unidentified_914;g__unidentified_816;s__Ascomycota_sp	-	-	-	-	-	-	-	Unassigned	-
ISV_933	k__Fungi;p__Olpidiomycota;c__GS18;o__GS18;f__unidentified_9512;g__unidentified_7880;s__GS18_sp	-	-	-	-	-	-	-	Unassigned	-
ISV_942	k__Fungi;p__Ascomycota;c__Eurotiomycetes;o__Chaetothyriales;f__Chaetothyriales_fam_Incertae_sedis;g__Ceratosporella;s__Ceratosporella_sp	-	-	-	-	-	-	-	Unassigned	-
ISV_944	k__Fungi;p__Ascomycota;c__unidentified_990;o__unidentified_968;f__unidentified_914;g__unidentified_816;s__Ascomycota_sp	-	-	-	-	-	-	-	Unassigned	-
ISV_950	k__Fungi;p__Ascomycota;c__Eurotiomycetes;o__Chaetothyriales;f__unidentified_888;g__unidentified_799;s__Chaetothyriales_sp	-	-	-	-	-	-	-	Unassigned	-
ISV_954	k__Fungi;p__Ascomycota;c__unidentified_990;o__unidentified_968;f__unidentified_914;g__unidentified_816;s__Ascomycota_sp	-	-	-	-	-	-	-	Unassigned	-
ISV_994	k__Fungi;p__Basidiomycota;c__Agaricomycetes;o__Polyporales;f__unidentified_990;g__unidentified_869;s__Polyporales_sp	-	-	-	-	-	-	-	Unassigned	-
ISV_995	k__Fungi;p__Ascomycota;c__Dothideomycetes;o__Pleosporales;f__unidentified_940;g__unidentified_836;s__Pleosporales_sp	-	-	-	-	-	-	-	Unassigned	-
ISV_1034	k__Fungi;p__Chytridiomycota;c__unidentified_1618;o__unidentified_1577;f__unidentified_1451;g__unidentified_1201;s__Chytridiomycota_sp	-	-	-	-	-	-	-	Unassigned	-
ISV_1057	k__Fungi;p__Ascomycota;c__Leotiomycetes;o__Helotiales;f__unidentified_29;g__unidentified_21;s__Helotiales_sp	-	-	-	-	-	-	-	Unassigned	-
ISV_1080	k__Fungi;p__Ascomycota;c__Sordariomycetes;o__Xylariales;f__Xylariales_fam_Incertae_sedis;g__Phialemoniopsis;s__Phialemoniopsis_sp	-	-	-	-	-	-	-	Unassigned	-
ISV_1102	k__Fungi;p__Ascomycota;c__Sordariomycetes;o__unidentified_947;f__unidentified_896;g__unidentified_805;s__Sordariomycetes_sp	-	-	-	-	-	-	-	Unassigned	-
ISV_1120	k__Fungi;p__Chytridiomycota;c__Chytridiomycetes;o__Chytridiales;f__unidentified_5272;g__unidentified_4271;s__Chytridiales_sp	-	-	-	-	-	-	-	Unassigned	-
ISV_1208	k__Fungi;p__Ascomycota;c__Eurotiomycetes;o__Chaetothyriales;f__unidentified_888;g__unidentified_799;s__Chaetothyriales_sp	-	-	-	-	-	-	-	Unassigned	-
ISV_1220	k__Fungi;p__Basidiomycota;c__Agaricomycetes;o__Polyporales;f__unidentified_990;g__unidentified_869;s__Polyporales_sp	-	-	-	-	-	-	-	Unassigned	-
ISV_1243	k__Fungi;p__Basidiomycota;c__Agaricomycetes;o__unidentified_1043;f__unidentified_977;g__unidentified_862;s__Agaricomycetes_sp	-	-	-	-	-	-	-	Unassigned	-
ISV_1258	k__Fungi;p__Ascomycota;c__Sordariomycetes;o__Sordariales;f__unidentified_39;g__unidentified_30;s__Sordariales_sp	-	-	-	-	-	-	-	Unassigned	-
ISV_1274	k__Fungi;p__Mucoromycota;c__Endogonomycetes;o__GS22;f__unidentified_14242;g__unidentified_12130;s__GS22_sp	-	-	-	-	-	-	-	Unassigned	-
ISV_1277	k__Fungi;p__Ascomycota;c__Sordariomycetes;o__Chaetosphaeriales;f__unidentified_3042;g__unidentified_2465;s__Chaetosphaeriales_sp	-	-	-	-	-	-	-	Unassigned	-
ISV_1314	k__Fungi;p__Ascomycota;c__Sordariomycetes;o__Chaetosphaeriales;f__unidentified_3042;g__unidentified_2465;s__Chaetosphaeriales_sp	-	-	-	-	-	-	-	Unassigned	-
ISV_1318	k__Fungi;p__Ascomycota;c__Leotiomycetes;o__Helotiales;f__unidentified_29;g__unidentified_21;s__Helotiales_sp	-	-	-	-	-	-	-	Unassigned	-
ISV_1342	k__Fungi;p__Ascomycota;c__Archaeorhizomycetes;o__unidentified_1590;f__unidentified_1464;g__unidentified_1212;s__Archaeorhizomycetes_sp	-	-	-	-	-	-	-	Unassigned	-
ISV_1348	k__Fungi;p__Ascomycota;c__Dothideomycetes;o__Pleosporales;f__unidentified_940;g__unidentified_836;s__Pleosporales_sp	-	-	-	-	-	-	-	Unassigned	-
ISV_1373	k__Fungi;p__Basidiomycota;c__unidentified_1343;o__unidentified_1307;f__unidentified_1215;g__unidentified_1048;s__Basidiomycota_sp	-	-	-	-	-	-	-	Unassigned	-
ISV_1392	k__Fungi;p__Basidiomycota;c__Tremellomycetes;o__Filobasidiales;f__Filobasidiaceae;g__Goffeauzyma;s__unclassified_Goffeauzyma	-	-	-	-	-	-	-	Unassigned	-
ISV_1405	k__Fungi;p__Ascomycota;c__Leotiomycetes;o__Helotiales;f__unidentified_29;g__unidentified_21;s__Helotiales_sp	-	-	-	-	-	-	-	Unassigned	-
ISV_1458	k__Fungi;p__Ascomycota;c__Sordariomycetes;o__Chaetosphaeriales;f__unidentified_3042;g__unidentified_2465;s__Chaetosphaeriales_sp	-	-	-	-	-	-	-	Unassigned	-
ISV_1476	k__Fungi;p__Basidiomycota;c__unidentified_1343;o__unidentified_1307;f__unidentified_1215;g__unidentified_1048;s__Basidiomycota_sp	-	-	-	-	-	-	-	Unassigned	-
ISV_1479	k__Fungi;p__Ascomycota;c__Sordariomycetes;o__Sordariales;f__unidentified_39;g__unidentified_30;s__Sordariales_sp	-	-	-	-	-	-	-	Unassigned	-
ISV_1549	k__Fungi;p__Ascomycota;c__Leotiomycetes;o__Helotiales;f__unidentified_29;g__unidentified_21;s__Helotiales_sp	-	-	-	-	-	-	-	Unassigned	-
ISV_1580	k__Fungi;p__Ascomycota;c__unidentified_990;o__unidentified_968;f__unidentified_914;g__unidentified_816;s__Ascomycota_sp	-	-	-	-	-	-	-	Unassigned	-
ISV_1591	k__Fungi;p__Basidiomycota;c__unidentified_1343;o__unidentified_1307;f__unidentified_1215;g__unidentified_1048;s__Basidiomycota_sp	-	-	-	-	-	-	-	Unassigned	-
ISV_1610	k__Fungi;p__Basidiomycota;c__unidentified_1343;o__unidentified_1307;f__unidentified_1215;g__unidentified_1048;s__Basidiomycota_sp	-	-	-	-	-	-	-	Unassigned	-
ISV_1626	k__Fungi;p__Basidiomycota;c__Tremellomycetes;o__Filobasidiales;f__Piskurozymaceae;g__Piskurozyma;s__unclassified_Piskurozyma	-	-	-	-	-	-	-	Unassigned	-
ISV_1635	k__Fungi;p__Ascomycota;c__unidentified_990;o__unidentified_968;f__unidentified_914;g__unidentified_816;s__Ascomycota_sp	-	-	-	-	-	-	-	Unassigned	-
ISV_1647	k__Fungi;p__Ascomycota;c__unidentified_990;o__unidentified_968;f__unidentified_914;g__unidentified_816;s__Ascomycota_sp	-	-	-	-	-	-	-	Unassigned	-
ISV_1664	k__Fungi;p__Ascomycota;c__Dothideomycetes;o__Pleosporales;f__unidentified_940;g__unidentified_836;s__Pleosporales_sp	-	-	-	-	-	-	-	Unassigned	-
ISV_1680	k__Fungi;p__Ascomycota;c__Leotiomycetes;o__Helotiales;f__unidentified_29;g__unidentified_21;s__Helotiales_sp	-	-	-	-	-	-	-	Unassigned	-
ISV_1697	k__Fungi;p__Chytridiomycota;c__unidentified_1618;o__unidentified_1577;f__unidentified_1451;g__unidentified_1201;s__Chytridiomycota_sp	-	-	-	-	-	-	-	Unassigned	-
ISV_1707	k__Fungi;p__Chytridiomycota;c__unidentified_1618;o__unidentified_1577;f__unidentified_1451;g__unidentified_1201;s__Chytridiomycota_sp	-	-	-	-	-	-	-	Unassigned	-
ISV_1709	k__Fungi;p__Chytridiomycota;c__unidentified_1618;o__unidentified_1577;f__unidentified_1451;g__unidentified_1201;s__Chytridiomycota_sp	-	-	-	-	-	-	-	Unassigned	-
ISV_1722	k__Fungi;p__Basidiomycota;c__Agaricomycetes;o__Trechisporales;f__unidentified_944;g__unidentified_840;s__Trechisporales_sp	-	-	-	-	-	-	-	Unassigned	-
ISV_1740	k__Fungi;p__Basidiomycota;c__unidentified_1343;o__unidentified_1307;f__unidentified_1215;g__unidentified_1048;s__Basidiomycota_sp	-	-	-	-	-	-	-	Unassigned	-
ISV_1753	k__Fungi;p__Rozellomycota;c__unidentified_2162;o__unidentified_2105;f__unidentified_1958;g__unidentified_1603;s__Rozellomycota_sp	-	-	-	-	-	-	-	Unassigned	-
ISV_1758	k__Fungi;p__Basidiomycota;c__Agaricomycetes;o__Hymenochaetales;f__unidentified_37;g__unidentified_27;s__Hymenochaetales_sp	-	-	-	-	-	-	-	Unassigned	-
ISV_1761	k__Fungi;p__Rozellomycota;c__unidentified_2162;o__unidentified_2105;f__unidentified_1958;g__unidentified_1603;s__Rozellomycota_sp	-	-	-	-	-	-	-	Unassigned	-
ISV_1781	k__Fungi;p__Rozellomycota;c__Rozellomycotina_cls_Incertae_sedis;o__GS05;f__unidentified_16467;g__unidentified_14139;s__GS05_sp	-	-	-	-	-	-	-	Unassigned	-
ISV_1796	k__Fungi;p__Ascomycota;c__unidentified_990;o__unidentified_968;f__unidentified_914;g__unidentified_816;s__Ascomycota_sp	-	-	-	-	-	-	-	Unassigned	-
ISV_1811	k__Fungi;p__Basidiomycota;c__unidentified_1343;o__unidentified_1307;f__unidentified_1215;g__unidentified_1048;s__Basidiomycota_sp	-	-	-	-	-	-	-	Unassigned	-
ISV_1825	k__Fungi;p__Ascomycota;c__Dothideomycetes;o__Pleosporales;f__unidentified_940;g__unidentified_836;s__Pleosporales_sp	-	-	-	-	-	-	-	Unassigned	-
ISV_1828	k__Fungi;p__Ascomycota;c__Leotiomycetes;o__Helotiales;f__unidentified_29;g__unidentified_21;s__Helotiales_sp	-	-	-	-	-	-	-	Unassigned	-
ISV_1834	k__Fungi;p__Mucoromycota;c__Endogonomycetes;o__GS21;f__unidentified_1459;g__unidentified_1208;s__GS21_sp	-	-	-	-	-	-	-	Unassigned	-
ISV_1838	k__Fungi;p__Ascomycota;c__unidentified_990;o__unidentified_968;f__unidentified_914;g__unidentified_816;s__Ascomycota_sp	-	-	-	-	-	-	-	Unassigned	-
ISV_1844	k__Fungi;p__Rozellomycota;c__unidentified_2162;o__unidentified_2105;f__unidentified_1958;g__unidentified_1603;s__Rozellomycota_sp	-	-	-	-	-	-	-	Unassigned	-
ISV_1873	k__Fungi;p__Ascomycota;c__Leotiomycetes;o__Helotiales;f__unidentified_29;g__unidentified_21;s__Helotiales_sp	-	-	-	-	-	-	-	Unassigned	-
ISV_1881	k__Fungi;p__Rozellomycota;c__unidentified_2162;o__unidentified_2105;f__unidentified_1958;g__unidentified_1603;s__Rozellomycota_sp	-	-	-	-	-	-	-	Unassigned	-
ISV_1899	k__Fungi;p__Chytridiomycota;c__GS14;o__unidentified_7473;f__unidentified_7167;g__unidentified_5879;s__GS14_sp	-	-	-	-	-	-	-	Unassigned	-
ISV_1909	k__Fungi;p__Ascomycota;c__Leotiomycetes;o__Helotiales;f__unidentified_29;g__unidentified_21;s__Helotiales_sp	-	-	-	-	-	-	-	Unassigned	-
ISV_1955	k__Fungi;p__Ascomycota;c__Sordariomycetes;o__Coniochaetales;f__unidentified_1471;g__unidentified_1219;s__Coniochaetales_sp	-	-	-	-	-	-	-	Unassigned	-
ISV_1966	k__Fungi;p__Ascomycota;c__Sordariomycetes;o__unidentified_947;f__unidentified_896;g__unidentified_805;s__Sordariomycetes_sp	-	-	-	-	-	-	-	Unassigned	-
ISV_1987	k__Fungi;p__Mucoromycota;c__Endogonomycetes;o__Endogonales;f__unidentified_1604;g__unidentified_1321;s__Endogonales_sp	-	-	-	-	-	-	-	Unassigned	-
ISV_1990	k__Fungi;p__Rozellomycota;c__unidentified_2162;o__unidentified_2105;f__unidentified_1958;g__unidentified_1603;s__Rozellomycota_sp	-	-	-	-	-	-	-	Unassigned	-
