# Supplementary material for: Small-scale variation in a pristine montane cloud forest: evidence on high soil fungal diversity and biogeochemical heterogeneity
Source: PeerJ. 2021 Aug 11;9:e11956. doi: 10.7717/peerj.11956 (PMC8364316; doi:10.7717/peerj.11956)
Supplement: Supplemental Information 3 [file peerj-09-11956-s003.xlsx]

## Sheet: Hoja1
	A1	A2	A3	Average A	B1	B2	B3	Average B	C1	C2	C3	Average C
pH	4.4	4.6	4.5	4.5	4.7	4.7	5	4.8	5.2	4.4	4.4	4.66667
TC	31.4	19.6	35.5	28.8333	65	76	19.7	53.5667	16.6	70	36.6	41.0667
TN	1.83	1.86	2.22	1.97	3.96	4.18	1.88	3.34	1.68	3.67	3.09	2.81333
TP	0.11	0.11	0.15	0.123333	0.23	0.25	0.11	0.196667	0.08	0.16	0.13	0.123333
DOC	151	83	117	117	287	172	52	170.333	97	126	86	103
DON	4.41	9.84	5.27	6.50667	5.41	7.86	9.38	7.55	2.97	2.56	7.13	4.22
DOP	1.47	1.26	0.87	1.2	0.91	1.76	0.96	1.21	0.92	5.46	2.39	2.92333
NH4	19.9	3.23	13.05	12.06	22.71	23.14	3.64	16.4967	6.77	27.55	21.22	18.5133
Cmic	266	218	238	240.667	1215	875	583	891	147	767	618	510.667
Nmic	28.47	39.26	44.19	37.3067	56.72	86.84	37.57	60.3767	61.51	96.61	12	56.7067
Pmic	7.19	3.68	8.39	6.42	8.97	4.27	7.3	6.84667	6.32	15.23	11.81	11.12
C:N	9.3	5.5	5.4	6.73333	21	10	16	15.6667	2.4	8	52	20.8
C:P	37	59	28	41.3333	135	205	80	140	23	50	52	41.6667
N:P	4	11	5.2	6.73333	6.3	20	5	10.4333	10	6	1	5.66667
Lac	6.09	NA	422.81	214.45	793.23	548.86	246.45	529.513	361.07	NA	8.03	184.55
GluSid	0.13	NA	0.13	0.13	0.1	0.17	0.19	0.153333	0.03	NA	0.07	0.05
CeloBiHid	0.04	NA	0	0.02	0.12	0.18	0.95	0.416667	0.01	NA	0.06	0.035
GluMinD	0.14	NA	0.18	0.16	0.16	0.2	NA	0.18	0.03	NA	0.05	0.04
PMonEst	1.36	NA	1.58	1.47	2.7	2.88	1.52	2.36667	0.64	NA	2.49	1.565
PDiEst	0.03	NA	0.1	0.065	0.15	0.5	0.11	0.253333	0.08	NA	0.17	0.125
GluSid: b-1-4-glucosidase, CeloBiHid: cellobiohydrolase, Lac: Poliphenol Oxidase, GluMiniD: b-1-4-N-acetilGlucosaminidase, PMonEst: phosphomonoesterase, PDiEst: phosphodiesterase
TC: total carbon, TN: total nitrogen, TP: total phosphorous, DOC: disscolved organic carbon, DON: dissolved organic nitrogen, DOP: dissolved organic phosphorous, Cmic: carbon in microbial biomass, Nmic: nitrogen in microbial biomass, Pmic: phosphorous in microbial biomass
NA indicates non-available values (missing data)
